# Supplementary material for: Differential microRNA profile underlies the divergent healing responses in skin and oral mucosal wounds
Source: PubMed Central journal article supplement (PMC6509259; doi:10.1038/s41598-019-43682-w), 2019-05-09
Supplement: 41598_2019_43682_MOESM1_ESM.pdf [file 41598_2019_43682_MOESM1_ESM.pdf]

# **Differential microRNA profile underlies the divergent healing responses in skin and oral mucosal wounds**

Alyne Simões<sup>1,2</sup>, Lin Chen<sup>1</sup>, Zujian Chen<sup>3</sup>, Yan Zhao<sup>1</sup>, Shang Gao<sup>4</sup>, Phillip T. Marucha<sup>1,5</sup>, Yang Dai<sup>4</sup>, Luisa A. DiPietro<sup>1,6,\*</sup>, Xiaofeng Zhou<sup>1,3,6,7,\*</sup>

1. Center for Wound Healing & Tissue Regeneration, Department of Periodontics, College of Dentistry, University of Illinois at Chicago, Chicago, IL, USA.
2. Oral Biology Laboratory, Department of Biomaterials and Oral Biology, School of Dentistry, University of São Paulo, São Paulo, SP, Brazil.
3. Center for Molecular Biology of Oral Diseases, Department of Periodontics, College of Dentistry, University of Illinois at Chicago, Chicago, IL, USA.
4. Department of Bioengineering, College of Engineering, University of Illinois at Chicago, Chicago, IL, USA.
5. College of Dentistry, Oregon Health and Sciences University, Portland, OR, USA.
6. Graduate College, University of Illinois at Chicago, Chicago, IL, USA.
7. UIC Cancer Center, University of Illinois at Chicago, Chicago, IL, USA.

\* Co-corresponding Authors:

X. Zhou, University of Illinois at Chicago, College of Dentistry, 801 S. Paulina Street, Chicago, IL 60612, USA. Email: xfzhou@uic.edu

L.A. DiPietro, University of Illinois at Chicago, College of Dentistry, 801 S. Paulina Street, Chicago, IL 60612, USA. Email: ldipiet@uic.edu

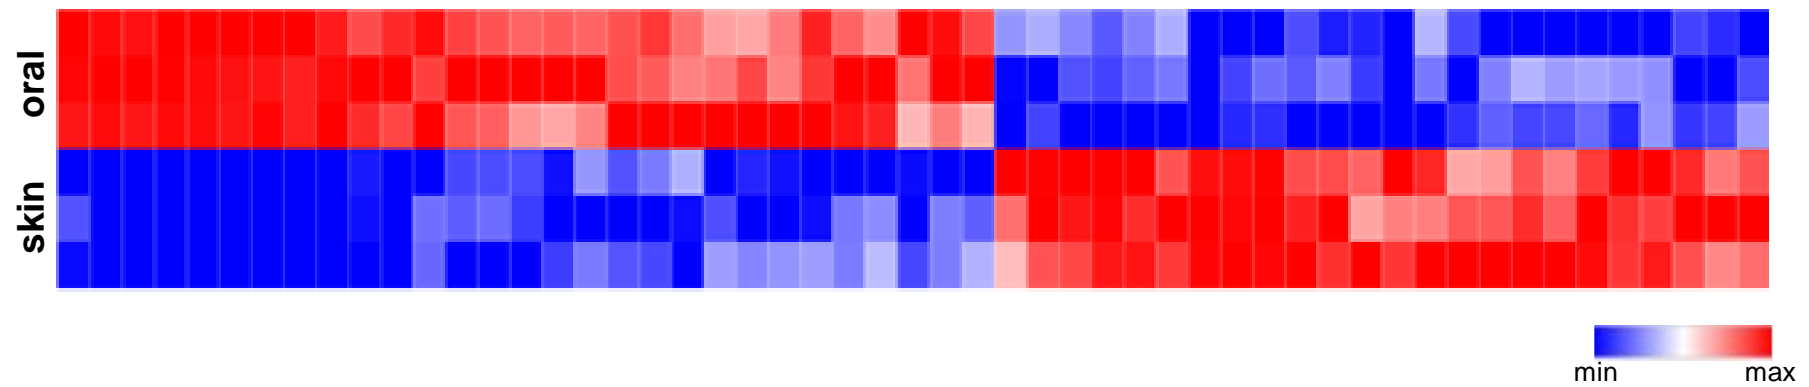

**Supplementary Figure S1: Tissue specific microRNA signatures for skin and oral mucosa epithelium.** MicroRNA profiling was performed on mouse skin and oral mucosal (palate) epithelium. Tissue specific microRNA signatures (presented as heatmap) for skin and oral mucosa epithelium were established by their differentially expression patterns (53 microRNAs,  $p < 0.01$ ).

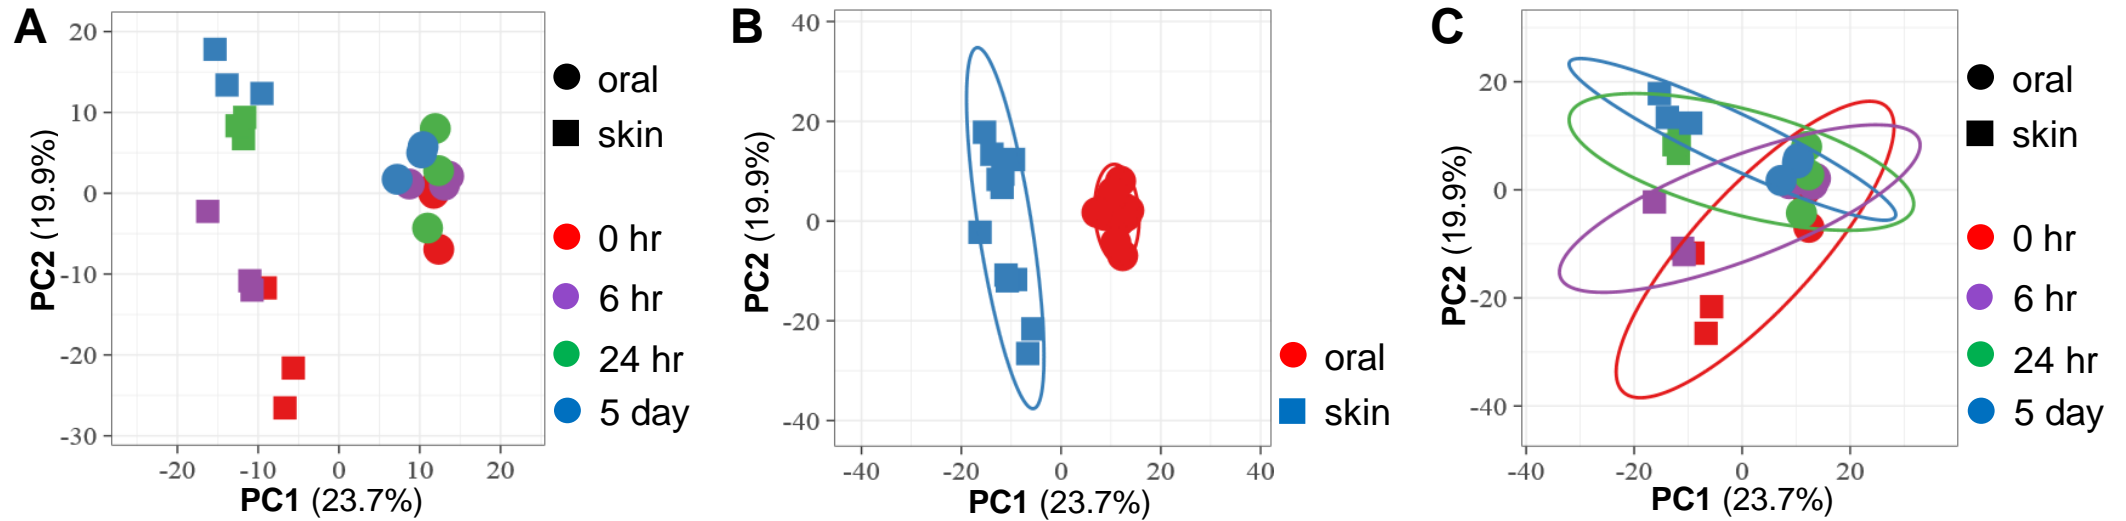

**Supplementary Figure S2: Testing the classification potential of miRNome by unsupervised learning method to find grouping in samples set.** Principal component analysis (PCA) was performed using the complete dataset (n=24), and PC1 and PC2 explain 23.7% and 19.9% of the variance, respectively (**A**). Prediction ellipses with probability of 0.95 were shown for tissue groups (**B**) and time group (**C**), indicate that PC1 can explain the variance associated with tissue specificity and PC2 appears to be associated with the variance related to wound healing time course.

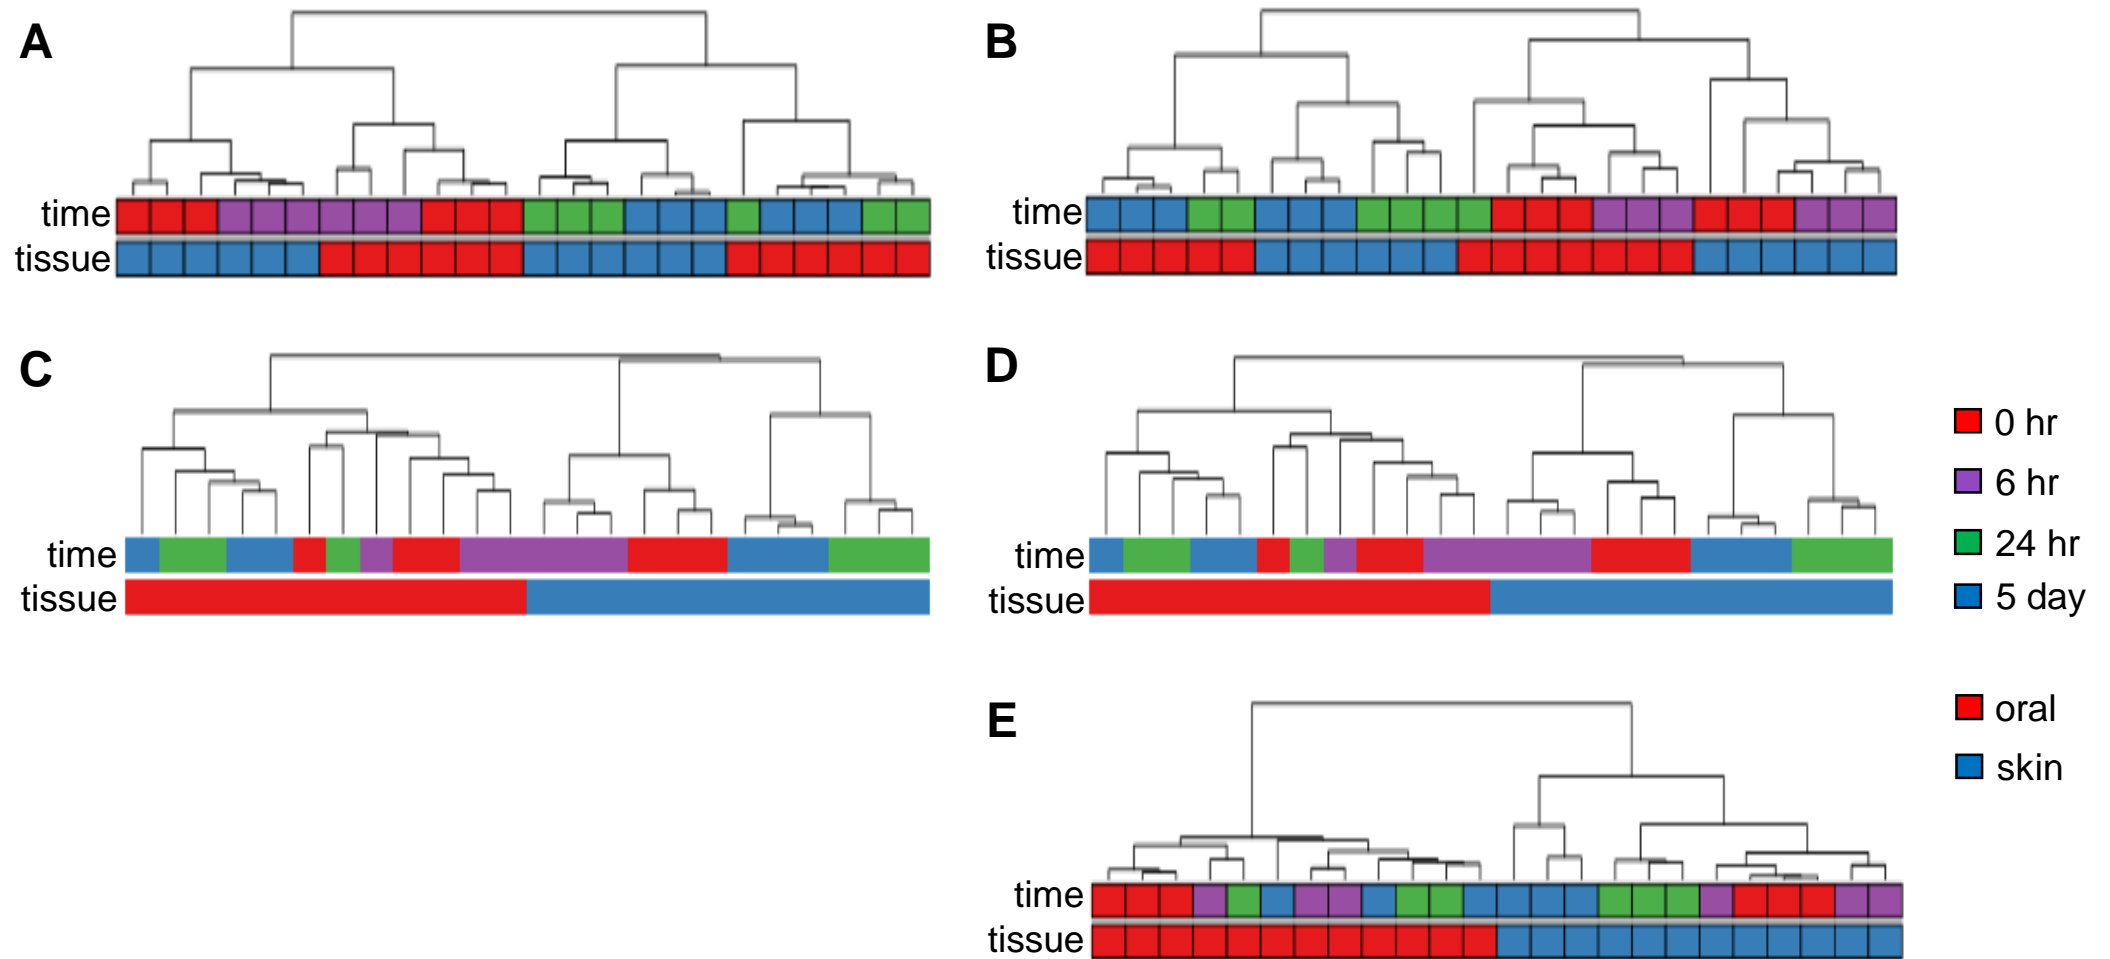

**Supplementary Figure S3: Testing the classification potential of microRNA signature sets by unsupervised learning method to find grouping in samples set.** Hierarchical clustering analysis was performed on the whole sample set ( $n=24$ ), using (A) 18 concurrently differentially expressed microRNAs associated with both skin and oral wound healing, (B) 33 differentially expressed microRNAs associated with oral wound healing, (C) 200 differentially expressed microRNAs associated with skin wound healing, (D) the combined 215 differentially microRNAs in wound healing, (E) 53 baseline tissue specific differentially expressed microRNAs.

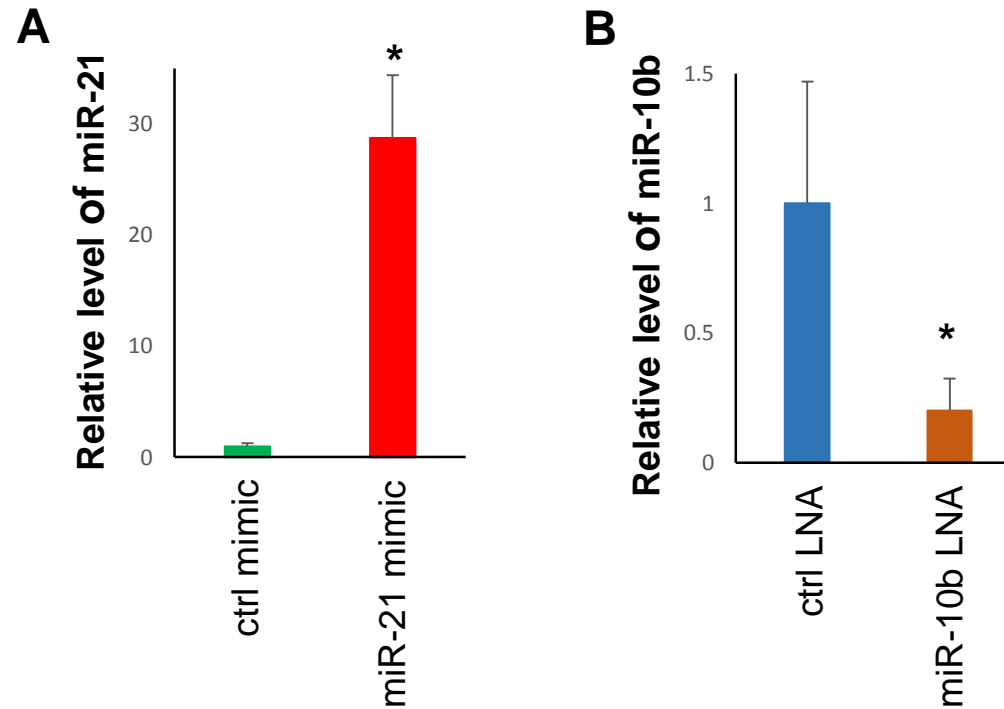

**Supplementary Figure S4: Confirmation of the microRNA mimic mediated up-regulation of miR-21 and the LNA inhibitor mediated down-regulation of miR-10b in mouse skin wounds.** (A) The miR-21 mimic or negative control mimic were delivered to the mouse skin wounds using an animal origin-free lipid nanoparticle (InvivoFectamine 3.0 Reagent from Invitrogen) at the time of injury. The microRNA mimic mediated up-regulation of miR-21 was confirmed by TaqMan assay-based real time PCR quantification on day 1 wound samples. (B) The LNA inhibitor for miR-10b or negative control LNA were delivered to the mouse skin wounds using an animal origin-free lipid nanoparticle (InvivoFectamine 3.0 Reagent from Invitrogen) at the time of injury. The LNA inhibitor mediated down-regulation of miR-10b was confirmed by TaqMan assay-based real time PCR quantification on wound tissue samples harvested at day 1 post-wounding (\*  $p < 0.05$ ).

**Supplementary Table S1: Top 10 most abundant microRNAs in skin and oral mucosa during wound healing**

| wound healing time course           | Skin      |              | oral mucosa |              |
|-------------------------------------|-----------|--------------|-------------|--------------|
|                                     | miR name  | % of miRNome | miR name    | % of miRNome |
| <b>0 hour (unwounded, baseline)</b> | miR-10b   | 0.13453      | miR-27b     | 0.096029     |
|                                     | miR-10a   | 0.076385     | miR-26a     | 0.063469     |
|                                     | miR-26a   | 0.065607     | miR-99a     | 0.059831     |
|                                     | miR-27b   | 0.060006     | miR-143     | 0.04909      |
|                                     | miR-99a   | 0.040932     | let-7c      | 0.045329     |
|                                     | miR-143   | 0.031033     | miR-125b    | 0.045091     |
|                                     | miR-125b  | 0.030901     | let-7f      | 0.034871     |
|                                     | let-7c    | 0.030461     | miR-199a    | 0.032343     |
|                                     | let-7f    | 0.029307     | miR-205     | 0.029648     |
|                                     | miR-1a    | 0.026512     | miR-203     | 0.029631     |
|                                     | miR-21    | 0.010946 *   | miR-21      | 0.013492 *   |
|                                     | miR-203   | 0.019338 *   | miR-10b     | 0.028247 *   |
|                                     |           |              | miR-10a     | 0.000472 *   |
| <b>6 hours post wounding</b>        | miR-10b   | 0.116332     | miR-27b     | 0.125659     |
|                                     | miR-1a    | 0.073676     | miR-99a     | 0.066628     |
|                                     | miR-10a   | 0.065049     | miR-26a     | 0.059918     |
|                                     | miR-27b   | 0.060364     | miR-143     | 0.057865     |
|                                     | miR-99a   | 0.058471     | let-7f      | 0.039192     |
|                                     | miR-26a   | 0.052577     | let-7c      | 0.037748     |
|                                     | miR-143   | 0.039734     | miR-125b    | 0.034433     |
|                                     | let-7f    | 0.037163     | miR-203     | 0.033448     |
|                                     | miR-133a  | 0.027194     | miR-199a    | 0.031841     |
|                                     | miR-99b   | 0.022871     | miR-21      | 0.024844     |
|                                     | miR-21    | 0.020463 *   |             |              |
| <b>24 hours post wounding</b>       | miR-21    | 0.064331     | miR-27b     | 0.110127     |
|                                     | miR-10b   | 0.052373     | miR-99a     | 0.053833     |
|                                     | miR-27b   | 0.050933     | miR-26a     | 0.053736     |
|                                     | miR-10a   | 0.049371     | miR-21      | 0.046823     |
|                                     | miR-99a   | 0.046014     | let-7c      | 0.044605     |
|                                     | let-7f    | 0.04268      | miR-143     | 0.042485     |
|                                     | miR-26a   | 0.040699     | let-7f      | 0.036187     |
|                                     | miR-146b  | 0.039564     | miR-199a    | 0.028033     |
|                                     | miR-143   | 0.03701      | miR-203     | 0.027665     |
|                                     | let-7c-5p | 0.03682      | miR-205     | 0.027606     |
| <b>5 days post wounding</b>         | miR-21    | 0.129953     | miR-27b     | 0.115615     |
|                                     | miR-27b   | 0.060603     | let-7c      | 0.051672     |
|                                     | miR-10b   | 0.037804     | miR-143     | 0.051497     |

|          |          |          |          |
|----------|----------|----------|----------|
| let-7f   | 0.036286 | miR-99a  | 0.051173 |
| miR-26a  | 0.036118 | miR-26a  | 0.047261 |
| miR-143  | 0.033552 | miR-21   | 0.040623 |
| miR-199a | 0.033522 | let-7f   | 0.038901 |
| let-7c   | 0.032773 | miR-199a | 0.031018 |
| miR-99a  | 0.030027 | miR-203  | 0.030965 |
| miR-146b | 0.030023 | miR-125b | 0.028131 |

---

note:

\*: While not in top 10, these selected miRs were also presented for comparancing between tissues.

**Supplementary Table S2: Baseline tissue-specific differentially expressed microRNAs between skin and oral mucosa epithelium**

| miR name    | p-value  | adj P   | Skin    |        | Oral   |        | miR_seq                       |
|-------------|----------|---------|---------|--------|--------|--------|-------------------------------|
|             |          |         | Mean    | StDev  | Mean   | StDev  |                               |
| miR-378a-3p | 1.29E-03 | 0.04304 | 15,167  | 183    | 6,013  | 400    | ACTGGACTTGGAGTCAGAAGGC        |
| miR-31-5p   | 1.85E-03 | 0.0523  | 437     | 140    | 9,980  | 739    | AGGCAAGATGCTGGCATAGCT         |
| miR-10a-5p  | 2.19E-03 | 0.05383 | 294,829 | 38,847 | 1,421  | 665    | TACCCTGTAGATCCGAATTTGT        |
| miR-10b-5p  | 2.52E-03 | 0.05931 | 519,259 | 82,583 | 85,095 | 24,872 | TACCCTGTAGAACCGAATTTGT        |
| miR-133a-3p | 4.19E-03 | 0.0818  | 55,766  | 31,546 | 3,956  | 1,681  | TTTGGTCCCTTCAACCAGCTGT        |
| miR-146b-5p | 4.92E-03 | 0.08283 | 66,712  | 6,568  | 10,796 | 3,023  | TGAGAACTGAATTCATAGGCTGT       |
| miR-126a-5p | 6.54E-03 | 0.096   | 3,437   | 491    | 6,408  | 985    | CATTATTACTTTTGGTACGCG         |
| miR-34c-5p  | 7.34E-03 | 0.09894 | 122     | 43     | 10,229 | 8,453  | AGGCAGTGTAGTTAGCTGATTGC       |
| miR-30a-5p  | 8.14E-03 | 0.09918 | 47,463  | 4,893  | 29,008 | 1,047  | TGTA AACATCCTCGACTGGAAGCT     |
| miR-96-5p   | 8.19E-03 | 0.09918 | 11,975  | 1,738  | 6,919  | 917    | TTTGGCACTAGCACATTTTGGCT       |
| miR-1a-3p   | 8.30E-03 | 0.09918 | 102,330 | 27,364 | 9,517  | 5,590  | TGGAATGTAAGAAGTATGTAT         |
| miR-451a    | 9.75E-03 | 0.10566 | 823     | 249    | 16,627 | 11,565 | AAACCGTTACCATTACTGAGT         |
| miR-470-5p  | 2.90E-05 | 0.00801 | 0       | 0      | 344    | 40     | TTCTTGACTGGCACTGGTGAGT        |
| miR-465b-3p | 4.23E-05 | 0.00801 | 0       | 0      | 21     | 2      | GATCAGGGCCTTTCTAAGTAGA        |
| miR-465c-5p | 4.24E-05 | 0.00801 | 0       | 0      | 73     | 9      | TATTTAGAATGGCGCTGATCTG        |
| miR-10a-3p  | 7.10E-05 | 0.01005 | 51      | 8      | 0      | 0      | CAAATTCGTATCTAGGGGAAT         |
| miR-881-3p  | 1.35E-04 | 0.01134 | 0       | 0      | 54     | 11     | AACTGTGTCTTTTCTGAATAGA        |
| miR-465a-5p | 1.47E-04 | 0.01134 | 0       | 0      | 106    | 27     | TATTTAGAATGGCACTGATGTGA       |
| miR-107-3p  | 1.58E-04 | 0.01134 | 842     | 50     | 442    | 23     | AGCAGCATTGTACAGGGCTATC        |
| miR-1247-3p | 1.60E-04 | 0.01134 | 0       | 0      | 24     | 6      | CGGGAACGTCGAGACTGGAGC         |
| miR-880-3p  | 2.50E-04 | 0.01574 | 0       | 0      | 55     | 15     | TACTCCATCCTCTCTGAGTAGA        |
| miR-211-5p  | 3.99E-04 | 0.01965 | 423     | 87     | 42     | 10     | TTCCCTTTGTCTATCCTTTGCCT       |
| miR-1247-5p | 4.36E-04 | 0.01965 | 12      | 5      | 601    | 286    | ACCCGTCCCGTTCGTCCCGGA         |
| miR-471-5p  | 4.46E-04 | 0.01965 | 0       | 0      | 22     | 9      | TACGTAGTATAGTGCTTTTAC         |
| miR-351-5p  | 4.51E-04 | 0.01965 | 1,991   | 168    | 4,097  | 329    | TCCCTGAGGAGCCCTTTGAGCCT       |
| miR-132-3p  | 8.69E-04 | 0.0335  | 34      | 1      | 122    | 13     | TAACAGTCTACAGCCATGGTCG        |
| miR-214-3p  | 8.88E-04 | 0.0335  | 2,337   | 229    | 4,735  | 453    | ACAGCAGGCACAGACAGGCAGT        |
| miR-1983    | 1.20E-03 | 0.04229 | 30      | 6      | 111    | 17     | CTCACCTGGAGCATGTTTTCT         |
| miR-34c     | 1.79E-03 | 0.0523  | 0       | 0      | 141    | 116    | AGGCAGTGTAGTTAGCTGATTGT       |
| miR-338-3p  | 1.84E-03 | 0.0523  | 470     | 59     | 1,124  | 77     | TCCAGCATCAGTGATTTTGT          |
| miR-872-3p  | 2.02E-03 | 0.05383 | 339     | 31     | 576    | 41     | TGA ACTATTGCAGTAGCCTCCT       |
| miR-378b_R  | 2.10E-03 | 0.05383 | 3,066   | 241    | 1,296  | 186    | ACTGGACTTGGAGTCAGAAGGCT       |
| miR-150-5p  | 2.68E-03 | 0.06073 | 1,669   | 199    | 3,217  | 367    | TCTCCCAACCCTTGACCAGT          |
| miR-193b-3p | 3.54E-03 | 0.07707 | 3,812   | 315    | 2,245  | 249    | AACTGGCCCACAAAGTCCCGCT        |
| miR-1a-1-5p | 3.97E-03 | 0.0818  | 47      | 26     | 3      | 2      | ACATACTCTTTATATGCCATA         |
| miR-467b-5p | 4.21E-03 | 0.0818  | 5       | 3      | 86     | 50     | TAAGTGCCTGCATGTATATGC         |
| miR-218-5p  | 4.34E-03 | 0.0818  | 128     | 24     | 294    | 51     | TTGTGCTTGATCTAACCATGT         |
| miR-375-3p  | 4.67E-03 | 0.08283 | 277     | 43     | 1,377  | 450    | TTTGTTCGTTGCGCTCGCGTGA        |
| miR-133a-5p | 4.81E-03 | 0.08283 | 272     | 3      | 25     | 7      | AGCTGGTAAAATGGAACCAAAT        |
| miR-676-5p  | 4.98E-03 | 0.08283 | 76      | 10     | 38     | 2      | ACTCTACAACCTTAGGACTTGC        |
| miR-672-5p  | 5.18E-03 | 0.0838  | 17      | 5      | 79     | 26     | TGAGGTTGGTGTACTGTGTGTGA       |
| miR-511-5p  | 5.43E-03 | 0.08531 | 19      | 3      | 4      | 1      | CATGCCTTTTGTCTGCACTCA         |
| miR-128-3p  | 6.27E-03 | 0.09588 | 954     | 60     | 398    | 69     | TCACAGTGAACCGGTCTCTTT         |
| miR-196a-5p | 6.61E-03 | 0.096   | 186     | 216    | 0      | 0      | TAGGTAGTTTCATGTTGTTGG         |
| miR-223-3p  | 6.86E-03 | 0.09705 | 706     | 134    | 289    | 24     | TGTCAGTTTGTCAAATACCCCAT       |
| miR-184-3p  | 7.25E-03 | 0.09894 | 41      | 5      | 22     | 3      | TGGACGGAGA ACTGATAAGGGT       |
| miR-378d    | 7.63E-03 | 0.09918 | 1,332   | 134    | 368    | 96     | ACTGGACTTGGAGTCAGAAGGT        |
| miR-23a-5p  | 7.94E-03 | 0.09918 | 5       | 2      | 16     | 4      | GGGGTTCTGGGGATGGGATTT         |
| miR-223-5p  | 8.56E-03 | 0.09918 | 105     | 15     | 19     | 6      | CGTGTATTTGACAAGCTGAGTTGGACACT |
| miR-501-3p  | 8.59E-03 | 0.09918 | 3,835   | 392    | 1,609  | 327    | AATGCACCCGGGCAAGGATTTGG       |
| miR-669a-5p | 8.81E-03 | 0.09972 | 5       | 2      | 28     | 3      | AGTTGTGTGTGCATGTTTATGTCT      |



|             |                 |         |     |    |     |    |                         |
|-------------|-----------------|---------|-----|----|-----|----|-------------------------|
| miR-874-3p  | <b>9.87E-03</b> | 0.10566 | 146 | 30 | 308 | 48 | CTGCCCTGGCCCGAGGGACCGAC |
| miR-1198-5p | <b>9.89E-03</b> | 0.10566 | 162 | 14 | 224 | 19 | TATGTGTTCTGGCTGGCTTGG   |

---

notes:

**miR name:** differentially expressed miRs that have the reads greater than the average (5458) of the dataset.

**adj P:** Benjamini-Hochberg adjusted P value.

**Supplementary Table S3: Differentially expressed microRNAs in oral mucosal wound healing**

| miRNA           | p-value   | adj P     | 0hr  |           |           | 6hr       |           |           | 24h       |           |                             | 5dy  |       |       | miR_seq |
|-----------------|-----------|-----------|------|-----------|-----------|-----------|-----------|-----------|-----------|-----------|-----------------------------|------|-------|-------|---------|
|                 |           |           | Fold | Chang     | StDev     | Fold      | Chang     | StDev     | Fold      | Chang     | StDev                       | Fold | Chang | StDev |         |
| rno-miR-378a-3p | 0.0008184 | 0.0867151 | 1    | 0.0664713 | 0.7328313 | 0.0347267 | 0.9548818 | 0.05151   | 1.0301608 | 0.09042   | ACTGGACTTGGAGTCAGAAGGC      |      |       |       |         |
| mmu-miR-148b-3p | 0.0035625 | 0.1320058 | 1    | 0.0999046 | 1.3048705 | 0.4011814 | 2.4221855 | 0.9691142 | 3.2551242 | 0.6331512 | TCAGTGCATCACAGAACCTTTGT     |      |       |       |         |
| mmu-miR-181a-5p | 0.0044725 | 0.1320058 | 1    | 0.1137351 | 0.8214249 | 0.0947066 | 0.6598383 | 0.0646125 | 0.7023587 | 0.0548996 | AACATTCAACGCTGTGCGGTGAGT    |      |       |       |         |
| mmu-miR-31-5p   | 0.0066523 | 0.1516625 | 1    | 0.0740672 | 0.8015539 | 0.2209285 | 0.9452544 | 0.0772447 | 1.4866995 | 0.1154021 | AGGCAAGATGCTGGCATAGCT       |      |       |       |         |
| mmu-miR-23b-3p  | 0.0071932 | 0.1516625 | 1    | 0.111629  | 0.7357408 | 0.0466384 | 1.0309673 | 0.1224344 | 0.9944933 | 0.0684041 | ATCACATTGCCAGGATTACC        |      |       |       |         |
| mmu-miR-200c-3p | 0.0092364 | 0.1632779 | 1    | 0.1557818 | 0.8651189 | 0.2146033 | 1.7654788 | 0.5850174 | 1.8783663 | 0.1905794 | TAATACTGCCGGTAAATGATGGA     |      |       |       |         |
| mmu-miR-195a-5p | 0.0097908 | 0.1632779 | 1    | 0.1120782 | 0.9076189 | 0.0649711 | 0.8820817 | 0.1469965 | 0.6635547 | 0.0478765 | TAGCAGCACAGAAATATTGGC       |      |       |       |         |
| mmu-miR-3068-5p | 0.0002268 | 0.0752639 | 1    | 0.257308  | 1.0663981 | 0.3900415 | 3.5321486 | 0.8150827 | 3.6866457 | 0.1352283 | TTGGAGTTCATGCAAGTTCTAAC     |      |       |       |         |
| mmu-miR-101c    | 0.0002632 | 0.0752639 | 1    | 0.1031532 | 3.6350439 | 0.4766979 | 1.6863383 | 0.5710504 | 1.4593673 | 0.2365202 | TACAGTACTGTGATAACTGAT       |      |       |       |         |
| mmu-miR-30a-3p  | 0.0006925 | 0.0867151 | 1    | 0.0882855 | 1.0545809 | 0.0647274 | 0.7847491 | 0.0160182 | 0.8296518 | 0.0335745 | CTTTCAGTCGGATGTTTGCAGC      |      |       |       |         |
| mmu-miR-17-5p   | 0.0007147 | 0.0867151 | 1    | 0.1584791 | 0.8475679 | 0.0483152 | 1.5117758 | 0.1628031 | 0.9948067 | 0.0465453 | CAAAGTGCTTACAGTGCAGGTAG     |      |       |       |         |
| mmu-miR-219a-5p | 0.0009096 | 0.0867151 | 1    | 0.2515456 | 0.8655548 | 0.1150959 | 1.9265423 | 0.2487612 | 0.9787669 | 0.078554  | TGATTGTCCAACGCAATTCTCG      |      |       |       |         |
| oan-miR-27b-3p  | 0.0013897 | 0.1075841 | 1    | 0.0529891 | 1.0604624 | 0.0815091 | 1.2212844 | 0.1148333 | 1.4813389 | 0.1309122 | TTCACAGTGGCTAAGTTCTGCGT     |      |       |       |         |
| mmu-miR-676-5p  | 0.001521  | 0.1075841 | 1    | 0.0587988 | 1.2536092 | 0.1310737 | 1.5343393 | 0.1647377 | 1.5822301 | 0.1767254 | ACTCTACAACCTTAGGACTTGC      |      |       |       |         |
| mmu-miR-187-5p  | 0.0020207 | 0.1075841 | 1    | 0.1332469 | 0.9633736 | 0.1775188 | 1.0897682 | 0.1082475 | 1.7067577 | 0.0787297 | AGGCTACAACACAGGACCCGGGA     |      |       |       |         |
| mmu-miR-136-5p  | 0.0020635 | 0.1075841 | 1    | 0.1548394 | 1.4044623 | 0.1419101 | 0.872338  | 0.052316  | 0.8988278 | 0.0852673 | AGGACTCCATTTGTTTTGATGAT     |      |       |       |         |
| mmu-miR-362-5p  | 0.0020689 | 0.1075841 | 1    | 0.3961423 | 0.8407961 | 0.4010792 | 3.2770347 | 1.3747622 | 4.2970719 | 0.8784176 | AATCCTTGGAACCTAGGTGTGAAT    |      |       |       |         |
| mmu-miR-434-3p  | 0.0023305 | 0.1110887 | 1    | 0.0890199 | 1.317616  | 0.0777199 | 0.7998577 | 0.1350153 | 0.9871484 | 0.0587686 | TTTGAACCATCACTCGACTCCT      |      |       |       |         |
| mmu-miR-20a-5p  | 0.002801  | 0.1232459 | 1    | 0.1382523 | 1.1142864 | 0.0608071 | 1.716838  | 0.3460544 | 1.4510558 | 0.0167519 | TAAAGTGCTTATAGTGCAGGTAG     |      |       |       |         |
| mmu-miR-425-3p  | 0.0035515 | 0.1320058 | 1    | 0.1509714 | 0.7956976 | 0.3416713 | 1.5800723 | 0.008423  | 1.9031004 | 0.134065  | CATCGGGAATGTCGTGTCCGCC      |      |       |       |         |
| mmu-miR-340-5p  | 0.0037138 | 0.1320058 | 1    | 0.0858626 | 2.052563  | 0.4916944 | 1.2777403 | 0.2398432 | 1.1007619 | 0.1596562 | TTATAAAGCAATGAGACTGATT      |      |       |       |         |
| mmu-miR-664-3p  | 0.0040783 | 0.1320058 | 1    | 0.0763262 | 0.9307747 | 0.0316889 | 0.7738323 | 0.146559  | 0.6382082 | 0.0549795 | TATTCATTTACTCCCCAGCCT       |      |       |       |         |
| mdo-miR-181a-5p | 0.0045652 | 0.1320058 | 1    | 0.4062099 | 0.4520095 | 0.1849618 | 1.5972577 | 0.5706788 | 1.6012956 | 0.1129886 | AACATTCAACGCTGTGCGGTGAGTTTT |      |       |       |         |
| mmu-miR-700-5p  | 0.0046156 | 0.1320058 | 1    | 0.0989355 | 0.8064185 | 0.0942522 | 0.6528607 | 0.0928495 | 0.678155  | 0.0392187 | TAAGGCTCCTCCTGTGCTTGC       |      |       |       |         |
| mmu-miR-7a-5p   | 0.0049464 | 0.13473   | 1    | 0.1152172 | 1.4026239 | 0.3423426 | 2.0379229 | 0.3815397 | 1.533827  | 0.1159376 | TGGAAGACTAGTGATTTTGTGTT     |      |       |       |         |
| mmu-miR-193b-3p | 0.0056089 | 0.1423618 | 1    | 0.1111418 | 0.5820916 | 0.0633109 | 0.6239657 | 0.1001622 | 0.5880681 | 0.1051606 | AACTGGCCACAAAGTCCCGCT       |      |       |       |         |
| mmu-miR-141-5p  | 0.0057243 | 0.1423618 | 1    | 0.1374447 | 1.2939718 | 0.0981627 | 1.4636957 | 0.4518719 | 0.703996  | 0.0905252 | CATCTCCAGTGCAGTGTGGA        |      |       |       |         |
| chi-let-7b-5p   | 0.0060559 | 0.1443321 | 1    | 0.2975176 | 0.5674505 | 0.268898  | 0.7429631 | 0.2223544 | 0.2416335 | 0.0560828 | CGTGGTGAGGTAGTAGTTGTGTGTT   |      |       |       |         |
| mmu-miR-369-3p  | 0.0072728 | 0.1516625 | 1    | 0.3373636 | 1.8783307 | 0.4679148 | 0.8015508 | 0.0371642 | 1.3602938 | 0.1336945 | AATAATACATGGTTGATCTTT       |      |       |       |         |
| mmu-miR-223-3p  | 0.007424  | 0.1516625 | 1    | 0.0825289 | 2.6603169 | 0.8650528 | 3.7225306 | 2.4601821 | 1.0758219 | 0.174759  | TGTCAGTTTGTCAAATACCCCAT     |      |       |       |         |
| cgr-miR-2424    | 0.0086861 | 0.1632779 | 1    | 0.2404127 | 1.3771909 | 0.1189381 | 1.0305804 | 0.0909723 | 0.7900936 | 0.0090443 | ACAGATCTTTGGTAATCTGATGGCT   |      |       |       |         |
| mmu-miR-185-5p  | 0.0089071 | 0.1632779 | 1    | 0.1768065 | 0.8605288 | 0.093547  | 1.1757479 | 0.1890558 | 1.4661178 | 0.1582404 | TGGAGAGAAAGGCAGTTCTCTGA     |      |       |       |         |
| mmu-miR-1981-5p | 0.0089076 | 0.1632779 | 1    | 0.1363764 | 0.7991036 | 0.0798437 | 1.5570912 | 0.6208528 | 2.1169091 | 0.5442181 | GTAAAGGCTGGGCTTAGACGTGG     |      |       |       |         |

notes:

adj P: Benjamini-Hochberg adjusted P value.

**Supplementary Table S4: Differentially expressed microRNAs in skin wound healing**

| miRNA           | p-value  | BH adj p-value | 0hr        |           |           | 6hr        |           |           | 24h        |           |                               | 5dy        |       |  | miR_seq |
|-----------------|----------|----------------|------------|-----------|-----------|------------|-----------|-----------|------------|-----------|-------------------------------|------------|-------|--|---------|
|                 |          |                | Fold Chang | StDev     |           | Fold Chang | StDev     |           | Fold Chang | StDev     |                               | Fold Chang | StDev |  |         |
| mmu-miR-362-5p  | 4.65E-08 | 1.37615E-05    | 1          | 0.0837141 | 0.6413249 | 0.0891709  | 4.2812828 | 0.4271781 | 5.5743529  | 0.866634  | AATCCTTGGAACTAGGTGTGAAT       |            |       |  |         |
| mmu-miR-378b    | 9.38E-07 | 0.000117099    | 1          | 0.5078893 | 101.84181 | 42.218462  | 68.367811 | 9.9917889 | 56.644035  | 8.8869892 | CCTGGACTTGGAGTCAGAAGGC        |            |       |  |         |
| mmu-miR-30a-5p  | 9.89E-07 | 0.000117099    | 1          | 0.1030876 | 1.2514485 | 0.111781   | 0.582879  | 0.0226006 | 0.453159   | 0.0342868 | TGTAACATCCTCGACTGGAAGCT       |            |       |  |         |
| mmu-miR-21a-5p  | 1.90E-06 | 0.000187873    | 1          | 0.2539178 | 1.9940871 | 0.2800941  | 4.5685168 | 0.3442066 | 8.7049501  | 1.4660301 | TAGCTTATCAGACTGATGTTGA        |            |       |  |         |
| mo-miR-140-3p   | 2.82E-06 | 0.000238909    | 1          | 0.0324798 | 0.8162478 | 0.1297814  | 2.9362838 | 0.404611  | 1.6118772  | 0.037681  | ACCACAGGGTAGAACACGGACT        |            |       |  |         |
| mmu-miR-132-3p  | 4.93E-06 | 0.000340665    | 1          | 0.0352686 | 1.5800502 | 0.2569972  | 3.4745052 | 0.9094494 | 7.8466167  | 1.5319354 | TAACAGTCTACAGCCATGGTCG        |            |       |  |         |
| mmu-miR-142a-5p | 5.18E-06 | 0.000340665    | 1          | 0.0255513 | 1.2848074 | 0.2651946  | 4.1437431 | 0.4405762 | 2.3621902  | 0.3453455 | CCCATAAAGTAGAAAGCACTAC        |            |       |  |         |
| mmu-miR-574-5p  | 6.15E-06 | 0.000363805    | 1          | 0.1303411 | 1.0603561 | 0.0365244  | 1.7632596 | 0.1948124 | 2.3909489  | 0.1317313 | TGAGTGTGTGTGTGTGAGTGT         |            |       |  |         |
| mmu-miR-363-3p  | 8.53E-06 | 0.000459292    | 1          | 0.0952857 | 0.6652307 | 0.0891167  | 2.0053947 | 0.4497003 | 2.7139678  | 0.2054663 | AATTGCACGGTATCCATCTGTAT       |            |       |  |         |
| mmu-miR-148b-3p | 1.21E-05 | 0.000596292    | 1          | 0.1225519 | 1.4401436 | 0.1791595  | 3.6437393 | 0.7899089 | 2.8325129  | 0.2177709 | TCAGTGCATCACAGAACTTTGT        |            |       |  |         |
| mmu-miR-370-3p  | 1.40E-05 | 0.000638568    | 1          | 0.0605291 | 1.3253023 | 0.1824486  | 1.0811611 | 0.4500462 | 7.6443345  | 1.0795915 | GCCTGCTGGGGTGGAACTGGT         |            |       |  |         |
| mmu-miR-503-5p  | 1.76E-05 | 0.00074296     | 1          | 0.0705028 | 2.5582538 | 1.259011   | 13.009299 | 3.9726796 | 24.044095  | 4.5673285 | TAGCAGCGGGAACAGTACTGCAG       |            |       |  |         |
| mmu-miR-130b-5p | 1.89E-05 | 0.000747309    | 1          | 0.3830448 | 0.7955666 | 0.0347566  | 4.3723402 | 0.7893309 | 2.7859502  | 0.2058123 | ACTCTTCCCTGTTGCACTACT         |            |       |  |         |
| mmu-miR-223-5p  | 2.13E-05 | 0.000786602    | 1          | 0.1439168 | 1.0131108 | 0.2574665  | 4.9520961 | 0.3066759 | 1.9972864  | 0.5349822 | CGTGTATTTGACAAGCTGAGTTGGACACT |            |       |  |         |
| mmu-miR-193b-3p | 2.63E-05 | 0.000843812    | 1          | 0.0826412 | 0.7382197 | 0.0453673  | 0.528423  | 0.1066424 | 0.2426527  | 0.0544516 | AACTGGCCACAAAAGTCCCGCT        |            |       |  |         |
| mmu-miR-133a-5p | 2.68E-05 | 0.000843812    | 1          | 0.0124961 | 1.6103408 | 0.6638912  | 0.6235684 | 0.0782252 | 0.2382276  | 0.0268378 | AGCTGTAAATGGAACCAAAT          |            |       |  |         |
| mmu-miR-409-3p  | 2.82E-05 | 0.000843812    | 1          | 0.1951633 | 1.643613  | 0.2753653  | 1.6411885 | 0.5257005 | 7.3129923  | 1.1643407 | GAATGTTGCTCGGTGAACCCCT        |            |       |  |         |
| mmu-miR-30e-3p  | 2.85E-05 | 0.000843812    | 1          | 0.1336761 | 1.0853182 | 0.0504217  | 0.7121563 | 0.0388258 | 0.4821073  | 0.0605488 | CTTTCAGTCGGATGTTTACAGC        |            |       |  |         |
| mmu-miR-540-3p  | 3.20E-05 | 0.000902329    | 1          | 0.303299  | 1.4690526 | 0.4930735  | 1.3405418 | 0.3674875 | 8.9795826  | 1.373148  | AGGTCAGAGGTCGATCCTGGGC        |            |       |  |         |
| mmu-miR-106b-3p | 3.48E-05 | 0.00093549     | 1          | 0.1005209 | 1.0092353 | 0.1131692  | 3.1954698 | 0.7250982 | 2.2884583  | 0.2963492 | CCGCACTGTGGTACTTGTCT          |            |       |  |         |
| cgr-miR-139-5p  | 3.93E-05 | 0.00101248     | 1          | 0.1717709 | 1.5692417 | 0.2170089  | 6.2644141 | 1.1548753 | 1.8048574  | 0.5971037 | TCTACAGTGCACGTGTCTCCAGT       |            |       |  |         |
| mmu-miR-3068-5p | 4.23E-05 | 0.001042265    | 1          | 0.1667673 | 0.6336216 | 0.051074   | 2.0222936 | 0.5268974 | 2.5359095  | 0.3824849 | TTGAGTTCATGCAAGTTCTAAC        |            |       |  |         |
| mmu-miR-1198-5p | 5.01E-05 | 0.001096217    | 1          | 0.0848818 | 1.2767261 | 0.0491863  | 2.4768726 | 0.5033243 | 1.9572109  | 0.151669  | TATGTTTCTCGGCTGGCTTGG         |            |       |  |         |
| mmu-miR-7a-5p   | 5.29E-05 | 0.001096217    | 1          | 0.2993717 | 1.8734799 | 0.1347995  | 5.4050207 | 0.8134072 | 5.6690703  | 1.739785  | TGGAAGACTAGTATTTTGTGTT        |            |       |  |         |
| mmu-miR-1983    | 5.38E-05 | 0.001096217    | 1          | 0.1999005 | 1.1325902 | 0.4877763  | 3.0117198 | 0.5608882 | 8.178836   | 2.1482012 | CTCACCTGGAGCATGTTTTCT         |            |       |  |         |
| mmu-miR-31-5p   | 5.45E-05 | 0.001096217    | 1          | 0.3202481 | 0.6691327 | 0.4225293  | 0.8408116 | 0.3884696 | 11.688945  | 1.7979082 | AGGCAAGATGCTGGCAGTACT         |            |       |  |         |
| mmu-miR-195a-5p | 5.56E-05 | 0.001096217    | 1          | 0.1482205 | 1.0863882 | 0.1409315  | 0.6123434 | 0.0445061 | 0.4327755  | 0.0546023 | TAGCAGCACAGAAATATTGGC         |            |       |  |         |
| mmu-miR-485-3p  | 5.93E-05 | 0.001133174    | 1          | 0.2459614 | 1.9433503 | 0.0360904  | 1.2241166 | 0.5878268 | 6.8873522  | 0.8276695 | GTCATACACGGCTCTCCTCTCT        |            |       |  |         |
| mmu-miR-223-3p  | 7.01E-05 | 0.001296402    | 1          | 0.1896275 | 3.4725465 | 1.0452788  | 21.881903 | 7.0927223 | 5.3417263  | 2.7982239 | TGTCAGTTTGTCAAATACCCCAT       |            |       |  |         |
| mmu-miR-667-3p  | 7.46E-05 | 0.001337691    | 1          | 0.1521384 | 0.8861784 | 0.191653   | 0.6646901 | 0.241756  | 3.5485176  | 0.349971  | TGACACCTGCCACCCAGCCCAAG       |            |       |  |         |
| mmu-miR-425-3p  | 8.08E-05 | 0.001402056    | 1          | 0.2348775 | 0.6035792 | 0.1815773  | 2.1053006 | 0.0998882 | 2.2176167  | 0.2181035 | CATCGGAATGTCGTGTCGCC          |            |       |  |         |
| mmu-miR-335-3p  | 8.29E-05 | 0.001402056    | 1          | 0.3701342 | 1.8152725 | 0.652019   | 0.9940331 | 0.1049006 | 6.5290917  | 1.3450705 | TTTTTCATTATTGCTCCTGACC        |            |       |  |         |
| mmu-miR-433-3p  | 8.93E-05 | 0.00146842     | 1          | 0.2100516 | 1.708403  | 0.338726   | 1.6380816 | 0.5173994 | 5.8043222  | 0.7944497 | ATCATGATGGGCTCCTCGGTGT        |            |       |  |         |
| mmu-miR-30a-3p  | 1.03E-04 | 0.001644349    | 1          | 0.183004  | 1.2628488 | 0.156489   | 0.6681405 | 0.1129742 | 0.3797533  | 0.064559  | CTTTCAGTCGGATGTTTGCAGC        |            |       |  |         |
| mmu-miR-34c-5p  | 1.23E-04 | 0.00191319     | 1          | 0.3544813 | 1.8903948 | 0.3133666  | 3.4416824 | 0.5934597 | 35.217775  | 29.988102 | AGGCAGTGTAGTTAGCTGATTGC       |            |       |  |         |
| mmu-miR-298-5p  | 1.35E-04 | 0.001986375    | 1          | 0.1104028 | 1.5461294 | 0.6010547  | 2.0791757 | 0.5955064 | 8.4553965  | 1.8720677 | GGCAGAGGAGGGCTGTTCTTCCC       |            |       |  |         |
| mmu-miR-379-3p  | 1.38E-04 | 0.001986375    | 1          | 0.2696918 | 1.3416434 | 0.3230751  | 0.8762274 | 0.213002  | 4.2139488  | 0.7683176 | TATGTAACATGGTCCACTAAC         |            |       |  |         |
| mmu-let-7g-5p   | 1.44E-04 | 0.002025249    | 1          | 0.0380169 | 1.3297929 | 0.0565121  | 1.8645238 | 0.2929749 | 1.1722114  | 0.0564105 | TGAGGTAGTAGTTTGTACAGTT        |            |       |  |         |
| mmu-miR-3535    | 1.57E-04 | 0.002155566    | 1          | 0.2646319 | 1.1974208 | 0.3209042  | 0.4218387 | 0.082361  | 0.2401472  | 0.0560957 | TGGATATGATGACTGATTACCTGAGA    |            |       |  |         |

|                  |          |             |   |           |           |           |           |           |           |           |                           |
|------------------|----------|-------------|---|-----------|-----------|-----------|-----------|-----------|-----------|-----------|---------------------------|
| mmu-miR-96-5p    | 1.60E-04 | 0.002158314 | 1 | 0.1451501 | 1.059792  | 0.3840414 | 0.3436007 | 0.0457457 | 0.2286068 | 0.049049  | TTTGGCACTAGCACATTTTTTGTCT |
| hsa-miR-411-3p   | 1.81E-04 | 0.002375894 | 1 | 0.3764971 | 1.3391691 | 0.4468603 | 0.8979431 | 0.2188992 | 6.635335  | 1.6070453 | TATGTAACACGGTCCACTAAC     |
| mmu-miR-134-5p   | 1.93E-04 | 0.002477828 | 1 | 0.5045897 | 1.8306631 | 0.2552175 | 1.6669484 | 0.4641584 | 7.7421117 | 0.9986563 | TGTGACTGGTTGACCAGAGGGG    |
| mmu-miR-503-3p   | 1.97E-04 | 0.002477828 | 1 | 0.1669201 | 1.3625549 | 0.1656011 | 1.3606887 | 0.1713954 | 2.8326096 | 0.5163766 | GAGTATTGTTCCACTGCCTGG     |
| mmu-miR-351-3p   | 2.21E-04 | 0.002697113 | 1 | 0.5160102 | 3.1651568 | 0.5740431 | 4.2904132 | 0.3168941 | 12.748582 | 3.9546619 | GGTCAAGAGGGCCCTGGGAAC     |
| mmu-miR-30d-5p   | 2.31E-04 | 0.002697113 | 1 | 0.0801116 | 1.0830755 | 0.0613761 | 0.9045143 | 0.0719118 | 0.6733213 | 0.04992   | TGTAACATCCCCGACTGGAAGCT   |
| mmu-miR-467b-5p  | 2.32E-04 | 0.002697113 | 1 | 0.5601718 | 2.8944241 | 0.3901845 | 8.115511  | 3.272596  | 5.5245781 | 0.405032  | TAAGTCCTGCATGTATATGC      |
| mmu-miR-1a-3p    | 2.35E-04 | 0.002697113 | 1 | 0.2674081 | 2.9644116 | 1.6124386 | 0.7510039 | 0.0723657 | 0.3253727 | 0.0818349 | TGGAATGTAAGAAGTATGTAT     |
| mmu-miR-323-3p   | 2.39E-04 | 0.002697113 | 1 | 0.5585449 | 4.129499  | 0.7608464 | 3.4139647 | 1.6093895 | 15.024682 | 4.2041709 | CACATTACACGGTCGACCTCT     |
| mmu-miR-361-3p   | 2.41E-04 | 0.002697113 | 1 | 0.0792432 | 0.688706  | 0.0080252 | 1.0993344 | 0.162064  | 1.2191758 | 0.0198303 | CCCCCAGGTGTGATTCTGATTTGT  |
| mmu-miR-541-5p   | 2.59E-04 | 0.002844113 | 1 | 0.1833458 | 1.3577702 | 0.1383864 | 1.0916668 | 0.415887  | 5.4283139 | 1.4219507 | AAGGGATTCTGATGTTGGTCACACT |
| mmu-miR-26a-5p   | 2.85E-04 | 0.003068298 | 1 | 0.2251968 | 0.8548666 | 0.1153536 | 0.4822476 | 0.0365683 | 0.4036757 | 0.0567906 | TTCAGTAAATCCAGGATAGGCT    |
| mmu-miR-494-3p   | 3.16E-04 | 0.003343007 | 1 | 0.4294394 | 2.1115554 | 0.5560297 | 0.7715996 | 0.3377576 | 8.4825276 | 3.232242  | TGAAACATACACGGGAAACCTCT   |
| mmu-miR-376b-3p  | 3.30E-04 | 0.003408051 | 1 | 0.3440436 | 1.6609537 | 0.6776486 | 0.7467926 | 0.2669873 | 5.7122662 | 0.8513435 | ATCATAGAGGAACATCCACTT     |
| mmu-miR-186-5p   | 3.34E-04 | 0.003408051 | 1 | 0.0690767 | 1.1457398 | 0.1549692 | 0.587867  | 0.0332535 | 0.6642662 | 0.106961  | CAAAGAATCTCCTTTTGGGCT     |
| mmu-miR-212-5p   | 3.59E-04 | 0.003562603 | 1 | 0.3830206 | 2.1547657 | 0.4243423 | 3.2183497 | 0.9333186 | 6.9008617 | 1.8257686 | ACCTTGGCTCTAGACTGCTTACT   |
| mmu-miR-15b-3p   | 3.61E-04 | 0.003562603 | 1 | 0.0305556 | 0.8181714 | 0.1699805 | 2.3387035 | 0.6628641 | 2.2079041 | 0.2324212 | CGAATCATTATTTGCTGCTCT     |
| rno-miR-25-3p    | 3.67E-04 | 0.003562603 | 1 | 0.1632616 | 1.0748019 | 0.095391  | 2.2901618 | 0.4756695 | 1.6257507 | 0.0638482 | CATTGCACTGTCTCGGTCTGA     |
| mmu-miR-543-3p   | 3.80E-04 | 0.003566687 | 1 | 0.7012131 | 2.5617578 | 0.5445745 | 2.1204736 | 0.2965955 | 12.495648 | 2.3040777 | AAACATTGCGGGTGCACCTTCTT   |
| mmu-miR-204-5p   | 3.86E-04 | 0.003566687 | 1 | 0.1804009 | 1.0925747 | 0.2258802 | 0.8357314 | 0.1992158 | 0.229482  | 0.09897   | TTCCCTTTGTATCCTATGCCT     |
| mmu-miR-200a-3p  | 4.00E-04 | 0.003642225 | 1 | 0.1610251 | 1.1346017 | 0.0737134 | 1.0736307 | 0.0458806 | 0.4867077 | 0.1251561 | TAACACTGTCTGGTAACGATGT    |
| cfa-miR-194      | 4.25E-04 | 0.003812687 | 1 | 0.3220983 | 1.197963  | 0.4374698 | 5.4768064 | 1.0668365 | 3.079215  | 0.826779  | TGTAACAGCAACTCCATGTGGAT   |
| mmu-miR-34b-3p   | 4.67E-04 | 0.004117098 | 1 | 0.0983948 | 2.4936436 | 0.4709371 | 3.3565731 | 1.2588176 | 31.724868 | 31.777169 | AATCACTAACTCCACTGCCATC    |
| mmu-miR-450b-5p  | 4.73E-04 | 0.004117098 | 1 | 0.4271449 | 1.822944  | 0.3300301 | 4.0121439 | 1.1600193 | 4.784724  | 1.1127844 | TTTTGCAGTATGTTCTGAATAC    |
| mmu-miR-3470a-p3 | 5.06E-04 | 0.004255833 | 1 | 0.3114472 | 5.1495352 | 2.9759897 | 8.2700526 | 1.2078015 | 2.1132654 | 0.5770552 | TGCCTCTGCCTCCTGAGTGC      |
| mmu-miR-679-5p   | 5.06E-04 | 0.004255833 | 1 | 0.6020162 | 1.2697043 | 0.1811856 | 0.4040892 | 0.1382002 | 3.96496   | 1.2275843 | TTGACTGTGAGGTGACTCTTGGT   |
| cgr-miR-139-3p   | 5.10E-04 | 0.004255833 | 1 | 0.6151021 | 1.3568197 | 0.1397321 | 7.1855223 | 1.3224754 | 3.8051502 | 1.2796347 | TGGAGACGCGGCCCTGTTGGAGT   |
| mmu-miR-125a-3p  | 5.21E-04 | 0.004265844 | 1 | 0.2462619 | 1.5251663 | 0.1751887 | 2.4627273 | 0.4619914 | 2.3824232 | 0.061039  | ACAGGTGAGGTTCTTGGGAGC     |
| hsa-mir-4450-p3  | 5.26E-04 | 0.004265844 | 1 | 0         | 423.0273  | 730.97273 | 30564.027 | 5904.1359 | 20063.524 | 6812.6168 | CCCCTGGTCCCGTGG           |
| mmu-miR-382-5p   | 5.34E-04 | 0.004274067 | 1 | 0.2798859 | 1.7164581 | 0.6450547 | 2.1983785 | 0.5719527 | 5.3355518 | 0.9304146 | GAAGTTGTTGCTGGTGGATTCCG   |
| mmu-miR-152-5p   | 5.42E-04 | 0.004274247 | 1 | 0.0518277 | 0.7466772 | 0.0321612 | 0.7031543 | 0.1416423 | 1.5704891 | 0.2917459 | TAGTTCTGTGATACACTCCGACT   |
| mmu-miR-877-5p   | 6.10E-04 | 0.004692327 | 1 | 0.3079597 | 1.4961093 | 0.0473247 | 2.0203964 | 0.3501595 | 2.5746913 | 0.1153542 | GTAGAGGAGATGGCGCAGGGGACA  |
| mmu-miR-130b-3p  | 6.27E-04 | 0.004755625 | 1 | 0.5063375 | 0.3902219 | 0.1459471 | 3.0441247 | 0.9317452 | 2.8090063 | 0.99998   | CAGTGCAATGATGAAAGGGCAT    |
| mmu-miR-125b-5p  | 6.75E-04 | 0.005008493 | 1 | 0.2615703 | 0.602216  | 0.1009059 | 0.3162235 | 0.0351576 | 0.4942301 | 0.0759235 | TCCCTGAGACCCTAACTGTGA     |
| mmu-miR-145a-3p  | 6.77E-04 | 0.005008493 | 1 | 0.0664913 | 1.3256934 | 0.1505205 | 0.6756536 | 0.0903052 | 0.6451689 | 0.1304375 | GGATTCTGGAAATACTGTCTCT    |
| mmu-miR-1193-3p  | 7.06E-04 | 0.005131305 | 1 | 0.2535784 | 1.808854  | 0.6342052 | 0.6718077 | 0.2675109 | 3.7330045 | 0.8049799 | TAGTCCACCGTTTTACTATC      |
| mmu-miR-181c-5p  | 7.11E-04 | 0.005131305 | 1 | 0.1711084 | 0.902911  | 0.1426848 | 0.5856032 | 0.1623561 | 0.3183347 | 0.0794569 | AACATTCAACCTGTGCGGTGAGT   |
| mmu-miR-669c-5p  | 7.53E-04 | 0.005368925 | 1 | 0.3905979 | 0.8600733 | 0.229576  | 3.8504176 | 1.1115969 | 2.461776  | 0.3822116 | ATAGTTGTGTGTGGATGTGTGT    |
| mmu-miR-21a-3p   | 7.62E-04 | 0.005369281 | 1 | 0.9340874 | 5.2760077 | 2.7618646 | 15.400221 | 7.0625357 | 20.108678 | 4.3897202 | CAACAGCAGTCGATGGGCTGT     |
| hsa-miR-320b     | 7.95E-04 | 0.005511112 | 1 | 0.2189228 | 1.1937658 | 0.1912847 | 1.4762131 | 0.3631229 | 0.4490728 | 0.1131755 | AAAAGCTGGGTTGAGAGGGT      |
| mmu-miR-365-3p   | 8.01E-04 | 0.005511112 | 1 | 0.30881   | 0.5384289 | 0.0563338 | 0.3219968 | 0.0683889 | 0.309191  | 0.062356  | TAATGCCCTAAAAATCCTTAT     |
| mmu-miR-361-5p   | 8.31E-04 | 0.005651865 | 1 | 0.2585363 | 1.214897  | 0.108786  | 2.5187528 | 0.3208922 | 1.7109224 | 0.2354898 | TTATCAGAACTCCAGGGGTAC     |
| mmu-miR-1a-1-5p  | 8.64E-04 | 0.005810023 | 1 | 0.5504198 | 1.6179643 | 0.6028675 | 0.7709123 | 0.4339074 | 0.1381317 | 0.0368482 | ACATACTCTTTATATGCCATA     |

|                   |          |             |   |           |           |           |           |           |           |           |                            |
|-------------------|----------|-------------|---|-----------|-----------|-----------|-----------|-----------|-----------|-----------|----------------------------|
| mdo-miR-22-3p     | 9.34E-04 | 0.006215807 | 1 | 0.2597698 | 3.4874247 | 0.4413912 | 2.1055126 | 0.1832964 | 2.034302  | 0.6535229 | CAGCTGCCAGTTGAAGAACTGC     |
| ptr-miR-203       | 9.53E-04 | 0.006216654 | 1 | 0.4441403 | 0.570919  | 0.0756663 | 0.3749706 | 0.0370697 | 0.2519709 | 0.0313367 | TGAAATGTTTAGGACCACTAGAAT   |
| ptr-let-7i        | 9.56E-04 | 0.006216654 | 1 | 0.089807  | 1.0789105 | 0.0827996 | 1.5217702 | 0.2550633 | 1.624975  | 0.0551918 | TGAGGTAGTAGTTTTGTGCTGTT    |
| mmu-miR-30c-5p    | 9.80E-04 | 0.006306472 | 1 | 0.1339291 | 0.9809341 | 0.0244722 | 0.7775185 | 0.0205516 | 0.6348351 | 0.078099  | TGTAACATCCTCACTACCTGACCT   |
| mmu-miR-99a-5p    | 9.96E-04 | 0.006316442 | 1 | 0.0842003 | 1.5237995 | 0.1828551 | 0.8738889 | 0.2086207 | 0.5379115 | 0.1481965 | AACCCGTAGATCCGACTCTTGT     |
| mmu-miR-532-5p    | 1.00E-03 | 0.006316442 | 1 | 0.2361885 | 1.1308605 | 0.2618443 | 2.3098308 | 0.367316  | 2.316798  | 0.4282187 | CATGCCCTTGAGTGTAGGACCGT    |
| mmu-miR-203-3p    | 1.02E-03 | 0.006378673 | 1 | 0.0320972 | 0.7815985 | 0.0756983 | 0.6285213 | 0.0475543 | 0.5676929 | 0.1051031 | TGAAATGTTTAGGACCACTAGT     |
| mmu-miR-369-5p    | 1.06E-03 | 0.006515823 | 1 | 0.1892327 | 1.906397  | 0.3355055 | 1.2184863 | 0.2815081 | 2.689006  | 0.4215147 | AGATCGACCGTGTATATTCGC      |
| mmu-mir-3470b-p5  | 1.11E-03 | 0.006661251 | 1 | 0.0282929 | 1.07393   | 0.0937758 | 1.9358043 | 0.4643978 | 0.7823614 | 0.1765447 | TGTAGCCCTGGCTGTCC          |
| mmu-miR-133a-3p   | 1.11E-03 | 0.006661251 | 1 | 0.5656919 | 2.0078005 | 1.0507723 | 0.6972099 | 0.3142804 | 0.1621058 | 0.0153855 | TTTGGTCCCTTCAACCAGCTGT     |
| mmu-miR-872-3p    | 1.14E-03 | 0.006738455 | 1 | 0.0921454 | 0.7905882 | 0.0106498 | 0.7117445 | 0.09328   | 1.1642097 | 0.1323534 | TGAACTATTGCAGTAGCCTCCT     |
| hsa-miR-4448      | 1.17E-03 | 0.006738455 | 1 | 0.7641477 | 1.5148669 | 1.040295  | 13.416246 | 5.3000464 | 4.1536743 | 0.8637108 | GGCTCGTTGGTCTAGGGG         |
| mmu-miR-10b-5p    | 1.17E-03 | 0.006738455 | 1 | 0.1590404 | 0.9224281 | 0.4031696 | 0.302635  | 0.0911346 | 0.2060538 | 0.0682445 | TACCCTGTAGAACCGAATTTGT     |
| mmu-miR-708-3p    | 1.17E-03 | 0.006738455 | 1 | 0.2572063 | 1.2745179 | 0.1359119 | 0.7035791 | 0.1237406 | 0.5078613 | 0.0593653 | CAACTAGACTGTGAGCTTCTAGT    |
| mmu-miR-125b-1-3p | 1.19E-03 | 0.006757886 | 1 | 0.3020723 | 2.709657  | 0.0590845 | 1.7070669 | 0.2485054 | 1.6080386 | 0.1214718 | ACGGGTTAGGCTCTGGGAGCT      |
| mmu-miR-5099      | 1.20E-03 | 0.006757886 | 1 | 0.1587364 | 1.2776844 | 0.336601  | 3.3656113 | 0.9662659 | 1.6002579 | 0.1353409 | TCTTAGATCGATGTGGTGCTC      |
| rno-miR-214-3p    | 1.23E-03 | 0.006857908 | 1 | 0.0981375 | 0.8395052 | 0.2117344 | 0.8169993 | 0.1111326 | 1.8510233 | 0.2991751 | ACAGCAGGCACAGACAGGCAGT     |
| mdo-miR-26-5pC    | 1.26E-03 | 0.006997458 | 1 | 0.316483  | 0.7956475 | 0.0435024 | 0.3702769 | 0.0857739 | 0.4072611 | 0.0795074 | TTCAAGTAACCCAGGATAGGCT     |
| mmu-miR-615-3p    | 1.30E-03 | 0.007111274 | 1 | 0.1234199 | 1.0080731 | 0.2256506 | 0.8355923 | 0.1584079 | 2.4102891 | 0.5818651 | TCCGAGCCTGGGTCTCCCTCT      |
| mmu-miR-340-3p    | 1.31E-03 | 0.007111274 | 1 | 0.223756  | 1.1499104 | 0.1054169 | 2.0666786 | 0.2216629 | 1.3222915 | 0.1005315 | TCCGTCTCAGTTACTTTATAGC     |
| mmu-miR-212-3p    | 1.34E-03 | 0.007211834 | 1 | 0.650503  | 1.7846136 | 0.7098364 | 5.9406308 | 2.5047141 | 7.6220823 | 1.8044612 | TAACAGTCTCCAGTCACGGCC      |
| mmu-miR-192-5p    | 1.39E-03 | 0.007418295 | 1 | 0.1520014 | 1.2029768 | 0.1076329 | 1.3479674 | 0.0514551 | 0.7931981 | 0.0929728 | CTGACCTATGAATTGACAGCC      |
| mmu-miR-337-5p    | 1.40E-03 | 0.007418295 | 1 | 0.1743153 | 1.8870253 | 0.6741124 | 1.1635705 | 0.1782623 | 3.2104453 | 0.5461503 | CGGCGTCATGCAGGAGTTGATT     |
| mmu-miR-673-5p    | 1.45E-03 | 0.007570487 | 1 | 0.3511423 | 1.2538674 | 0.3364797 | 0.5105595 | 0.1806137 | 2.4970974 | 0.3003384 | CTCACAGCTCTGGTCTTTGAGC     |
| mmu-miR-146b-3p   | 1.48E-03 | 0.007673969 | 1 | 0.2384586 | 1.8645249 | 0.7113588 | 3.6254825 | 0.0704519 | 2.298739  | 0.3943435 | GCCCTAGGGACTCAGTTCTGGT     |
| mmu-miR-299b-3p   | 1.58E-03 | 0.008119127 | 1 | 0.5459631 | 1.8728109 | 0.4820067 | 1.1168657 | 0.2777005 | 4.8652691 | 1.3935738 | GTATGTGGGACGGTAAACCGCT     |
| mmu-miR-329-5p    | 1.63E-03 | 0.008214548 | 1 | 0.2896125 | 1.6732116 | 0.198918  | 0.8809755 | 0.2324953 | 2.4263452 | 0.4331832 | AGAGGTTTTCTGGGTCTCTGTTT    |
| mmu-miR-423-3p    | 1.63E-03 | 0.008214548 | 1 | 0.1233289 | 0.8636987 | 0.0333471 | 1.3855005 | 0.264183  | 1.4785747 | 0.0413327 | AGCTCGTCTGAGGCCCTCAGT      |
| mmu-miR-1195      | 1.64E-03 | 0.008214548 | 1 | 0.3114472 | 2.1630132 | 0.8272173 | 6.9081157 | 1.4070997 | 1.6468567 | 0.8384273 | TGAGTTTCAGGCCAGCCTGGCT     |
| mdo-miR-26-5p     | 1.67E-03 | 0.008284584 | 1 | 0.4683106 | 0.5418045 | 0.1753635 | 0.2301134 | 0.0138412 | 0.229103  | 0.0290966 | CGTGGTTCAAGTAATCCAGATAGGCT |
| mmu-miR-199a-5p   | 1.72E-03 | 0.008486035 | 1 | 0.0562269 | 0.7437197 | 0.1400344 | 0.4944118 | 0.1129725 | 1.2556766 | 0.2676846 | CCCAGTGTTTCAGACTACCTGTTC   |
| mmu-miR-200c-3p   | 1.79E-03 | 0.008741844 | 1 | 0.2116411 | 0.5786912 | 0.1911222 | 1.2939722 | 0.2034201 | 1.6404653 | 0.1749315 | TAATACTGCCGGTAATGATGGA     |
| mmu-miR-329-3p    | 1.82E-03 | 0.00874745  | 1 | 0.4003871 | 1.3164219 | 0.4512617 | 0.7721013 | 0.0459532 | 2.7046698 | 0.2062814 | AACACACCCAGCTAACCTTTTT     |
| mmu-miR-3068-3p   | 1.83E-03 | 0.00874745  | 1 | 0.0853513 | 1.3436764 | 0.1303298 | 0.8816311 | 0.1147326 | 0.7104505 | 0.1218952 | GGTGAATTGCAGTACTCCAAC      |
| mmu-miR-3473d     | 1.83E-03 | 0.00874745  | 1 | 0.0983948 | 0.6864788 | 0.4096885 | 1.5027072 | 0.221669  | 3.4271248 | 0.5691545 | CACTGAGCCACTTTCAGCCCT      |
| mmu-miR-340-5p    | 1.90E-03 | 0.008992678 | 1 | 0.4536075 | 2.6121444 | 1.098281  | 6.9295512 | 2.1219381 | 3.4206165 | 1.0923573 | TTATAAAGCAATGAGACTGATT     |
| mmu-miR-125a-5p   | 1.93E-03 | 0.00905272  | 1 | 0.3378152 | 0.5212082 | 0.1040373 | 0.2903637 | 0.0310685 | 0.4707845 | 0.0916847 | TCCCTGAGACCCTTTAACTGT      |
| mmu-miR-328-3p    | 1.94E-03 | 0.00905272  | 1 | 0.1269239 | 1.2531525 | 0.108406  | 1.073184  | 0.156667  | 0.7256735 | 0.0490708 | CTGGCCCTCTGCCCCCTCCGTT     |
| mmu-miR-181d-5p   | 1.96E-03 | 0.00905272  | 1 | 0.1154041 | 0.8370233 | 0.1188889 | 0.7635974 | 0.0925107 | 0.531843  | 0.0667381 | AACATTCATTGTTGTCGGTGGGT    |
| mmu-miR-98-3p     | 1.99E-03 | 0.009087899 | 1 | 0.2002938 | 0.9050202 | 0.1561054 | 0.9469613 | 0.2892732 | 2.4031906 | 0.3844809 | CTATACTACTACTTTCT          |
| mmu-miR-335-5p    | 2.00E-03 | 0.009087899 | 1 | 0.1500362 | 1.5836286 | 0.3175577 | 0.3961481 | 0.2564381 | 1.6974553 | 0.4220364 | TCAAGAGCAATAACGAAAAATGT    |
| mmu-miR-221-3p    | 2.05E-03 | 0.009198708 | 1 | 0.0451682 | 0.9441157 | 0.0433964 | 1.4548521 | 0.2312642 | 1.3346873 | 0.1339009 | AGCTACATTGTCTGCTGGGTTTC    |
| mmu-miR-132-5p    | 2.07E-03 | 0.009198708 | 1 | 0.7180719 | 4.5208297 | 2.2352513 | 8.8163452 | 2.5033658 | 15.456815 | 2.1802049 | ACCGTGCTTTCGATTGTTACT      |

|                   |          |             |   |           |           |           |           |           |           |           |                            |
|-------------------|----------|-------------|---|-----------|-----------|-----------|-----------|-----------|-----------|-----------|----------------------------|
| mmu-miR-30c-2-3p  | 2.08E-03 | 0.009198708 | 1 | 0.1992231 | 0.9653194 | 0.0988994 | 0.6472745 | 0.1060463 | 0.453801  | 0.0974637 | CTGGGAGAAGGCTGTTTACTCT     |
| mmu-miR-193b-5p   | 2.08E-03 | 0.009198708 | 1 | 0.0636888 | 0.9340729 | 0.098463  | 0.5763472 | 0.1918744 | 0.4791185 | 0.0592132 | CGGGGTTTTGAGGGCGAGATGA     |
| cgr-miR-214-5p    | 2.11E-03 | 0.00923999  | 1 | 0.2179683 | 0.8060234 | 0.100771  | 0.7994889 | 0.1596177 | 1.6202021 | 0.0989944 | TGCCTGTCTACACTTGTCTGTC     |
| mmu-miR-152-3p    | 2.18E-03 | 0.009485439 | 1 | 0.2107579 | 1.331513  | 0.1110373 | 1.2382011 | 0.116605  | 1.7990415 | 0.0460345 | TCAGTGCATGACAGATTGG        |
| mmu-miR-10a-5p    | 2.23E-03 | 0.009632311 | 1 | 0.1317609 | 0.9084143 | 0.3592673 | 0.5024623 | 0.1548674 | 0.2383207 | 0.0880976 | TACCCTGTAGATCCGAATTGT      |
| mmu-miR-10a-3p    | 2.25E-03 | 0.009632311 | 1 | 0.1532046 | 0.9745423 | 0.1714622 | 1.9002149 | 0.2383496 | 1.2308395 | 0.1886834 | CAAATTCGTATCTAGGGGAAT      |
| mmu-miR-674-5p    | 2.27E-03 | 0.009649775 | 1 | 0.1573378 | 0.7600588 | 0.1507554 | 1.231239  | 0.0935557 | 1.5412692 | 0.2082108 | GCACTGAGATGGGAGTGGTGTA     |
| mmu-miR-434-5p    | 2.38E-03 | 0.010064861 | 1 | 0.3704331 | 1.8505936 | 0.1136602 | 0.622515  | 0.2264647 | 1.9643819 | 0.349352  | GCTCGACTCATGGTTGAACCA      |
| chi-miR-99b-3p    | 2.46E-03 | 0.010323635 | 1 | 0.1695248 | 0.9689348 | 0.1332949 | 1.5792321 | 0.1267033 | 2.1772204 | 0.6362701 | CAAGCTCGTCTGTGGGTCCGT      |
| mmu-miR-351-5p    | 2.51E-03 | 0.010465544 | 1 | 0.0844893 | 1.4586638 | 0.3793304 | 0.9875856 | 0.2087979 | 2.4672966 | 0.6070181 | TCCCTGAGGAGCCCTTTGAGCCT    |
| mmu-miR-379-5p    | 2.58E-03 | 0.010688997 | 1 | 0.6197519 | 2.6005561 | 0.6625438 | 2.7930513 | 0.5480395 | 4.5700396 | 0.6675896 | TGGTAGACTATGGAACGTAGG      |
| hsa-miR-4454      | 2.71E-03 | 0.011135146 | 1 | 0.311402  | 1.1938938 | 0.1763517 | 2.3062566 | 0.152184  | 1.8604314 | 0.3211017 | TCGGATCCGAGTACGGCACCA      |
| mmu-miR-664-3p    | 2.86E-03 | 0.011691663 | 1 | 0.4108561 | 1.3226349 | 0.1018787 | 0.6945605 | 0.123068  | 0.3892615 | 0.0571229 | TATTCATTTACTCCCAGCCT       |
| mmu-miR-665-3p    | 2.89E-03 | 0.011721564 | 1 | 0.6152815 | 1.8785085 | 1.0785012 | 1.2135596 | 0.7321664 | 7.6085242 | 0.9796893 | ACCAGGAGGCTGAGGTCCCTTA     |
| mmu-miR-148b-5p   | 2.94E-03 | 0.011779138 | 1 | 0.2371952 | 1.5091068 | 0.1941134 | 1.6384198 | 0.4292438 | 2.5139179 | 0.2235382 | GAAGTTCTGTTATACACTCAGGC    |
| mmu-miR-107-3p    | 2.94E-03 | 0.011779138 | 1 | 0.0588604 | 0.7637262 | 0.043722  | 0.7815476 | 0.1566574 | 0.5728624 | 0.0601727 | AGCAGCATTGTACAGGGCTATC     |
| mmu-miR-574-3p    | 3.08E-03 | 0.012233153 | 1 | 0.159976  | 0.7226952 | 0.056914  | 0.6026445 | 0.0536147 | 0.7100194 | 0.0608214 | CACGCTCATGCACACCCACA       |
| mmu-miR-20a-5p    | 3.18E-03 | 0.012458717 | 1 | 0.2842205 | 1.3300627 | 0.2187253 | 2.704159  | 0.4683716 | 2.3073174 | 0.6753191 | TAAAGTGCTTATAGTGCAGGTAG    |
| rno-miR-181a-2-3p | 3.20E-03 | 0.012458717 | 1 | 0.2653292 | 1.5079592 | 0.560857  | 1.0365957 | 0.1916379 | 0.4258602 | 0.1266605 | ACCACCGACCGTTGACTGTACC     |
| mmu-miR-24-2-5p   | 3.29E-03 | 0.012747155 | 1 | 0.0415376 | 0.7326629 | 0.0577254 | 0.5196467 | 0.1204124 | 0.7367385 | 0.0788055 | GTGCCTACTGAGCTGAAACAGT     |
| mmu-miR-210-3p    | 3.34E-03 | 0.012844095 | 1 | 0.3060559 | 0.7264773 | 0.0703653 | 1.4910294 | 0.5197572 | 2.3399945 | 0.5231143 | CTGTGCGTGTGACAGCGGCTGA     |
| mmu-miR-484       | 3.53E-03 | 0.013400543 | 1 | 0.1607864 | 0.6242116 | 0.0959694 | 0.5689294 | 0.1027721 | 0.9602006 | 0.0738081 | TCAGGCTCAGTCCCTCCCGAT      |
| mmu-miR-221-5p    | 3.53E-03 | 0.013400543 | 1 | 0.123451  | 1.3830767 | 0.4084483 | 0.7507778 | 0.1707078 | 0.5391125 | 0.0653802 | ACCTGGCATACAATGTAGATTTCTGT |
| rno-miR-378a-5p   | 3.68E-03 | 0.013885205 | 1 | 0.1162085 | 1.2795807 | 0.4581227 | 0.7671961 | 0.1018661 | 0.4619925 | 0.1063637 | CTCCTGACTCCAGGTCCTGTGT     |
| mmu-miR-15b-5p    | 3.92E-03 | 0.014544485 | 1 | 0.254236  | 0.9961632 | 0.1559138 | 1.9864855 | 0.2866396 | 1.6486097 | 0.2356136 | TAGCAGCACATCATGGTTTACA     |
| mmu-miR-3102-p3   | 3.93E-03 | 0.014544485 | 1 | 0.1217697 | 1.1231961 | 0.0398356 | 1.2453359 | 0.1695152 | 1.7391794 | 0.2926564 | GAGCACCCATTGGCTACCCACA     |
| rno-miR-25-5p     | 4.02E-03 | 0.014777333 | 1 | 0.2642865 | 0.5820014 | 0.1125325 | 1.3843085 | 0.3165579 | 1.3872368 | 0.2148243 | AGGCGGAGACTTGGCAATTGCT     |
| rno-miR-874-3p    | 4.04E-03 | 0.014777333 | 1 | 0.203448  | 1.6711652 | 0.1747096 | 0.9866017 | 0.1144491 | 1.2519861 | 0.0609583 | CTGCCCTGGCCGAGGGACCGAC     |
| mmu-miR-1839-5p   | 4.17E-03 | 0.015161566 | 1 | 0.0349554 | 1.2111516 | 0.0284152 | 1.3177189 | 0.1793922 | 0.9655972 | 0.063744  | AAGGTAGTAGAACAGTCTTGT      |
| mmu-miR-3970      | 4.21E-03 | 0.015189612 | 1 | 0.0293925 | 1.6609021 | 0.6928908 | 2.5055393 | 0.1968514 | 1.2403072 | 0.1757495 | TGAGGTAGTAGTTTGTGCTT       |
| mmu-miR-211-5p    | 4.24E-03 | 0.015211967 | 1 | 0.2066138 | 0.5482685 | 0.2593193 | 0.4384779 | 0.0998019 | 0.2386098 | 0.0661386 | TTCCCTTTGTCATCCTTTGCTT     |
| mmu-miR-495-3p    | 4.32E-03 | 0.015413002 | 1 | 0.408068  | 1.5209092 | 0.4491724 | 0.8112002 | 0.2079628 | 3.2814585 | 0.9815277 | AAACAAACATGGTGCCTTCTT      |
| mmu-miR-1247-5p   | 4.37E-03 | 0.015475064 | 1 | 0.3893578 | 0.8500563 | 0.6325552 | 1.5219218 | 0.494682  | 8.504674  | 2.8816599 | ACCCGTCGCCGTTCCGCCGGA      |
| mmu-miR-300-3p    | 4.56E-03 | 0.016053992 | 1 | 0.3589051 | 1.9686281 | 0.7736451 | 1.2421537 | 0.5566182 | 3.8856108 | 0.6304635 | TATGCAAGGGCAAGCTCTCT       |
| mmu-miR-28c       | 4.62E-03 | 0.016168779 | 1 | 0.038418  | 2.5820541 | 0.5936916 | 2.346044  | 0.6593746 | 2.1849821 | 0.7020198 | AAGGAGCTCACAGTCTATTGAA     |
| mmu-miR-99a-3p    | 4.67E-03 | 0.016241055 | 1 | 0.3122041 | 0.5129538 | 0.0365709 | 0.34673   | 0.0542963 | 0.4371538 | 0.1392292 | CAAGCTCGTTTCTATGGGTCTGT    |
| mmu-miR-23b-3p    | 4.69E-03 | 0.016241055 | 1 | 0.1794263 | 0.711159  | 0.0856286 | 0.6373715 | 0.1060278 | 0.4965126 | 0.0713242 | ATCACATTGCCAGGGATTACC      |
| mmu-miR-676-5p    | 4.75E-03 | 0.016241143 | 1 | 0.1366818 | 0.784872  | 0.1113213 | 0.6072587 | 0.0551504 | 0.6484576 | 0.0842404 | ACTTACAACCTTAGGACTTGC      |
| mmu-miR-224-5p    | 4.75E-03 | 0.016241143 | 1 | 0.1463129 | 1.2226207 | 0.2474027 | 1.0545799 | 0.3656132 | 2.3652663 | 0.1931441 | TAAGTCACTAGTGGTCCGTTT      |
| mmu-miR-712-5p    | 4.87E-03 | 0.016575598 | 1 | 0.2597698 | 0.8459174 | 0.5202588 | 2.1886211 | 0.4080564 | 4.0927353 | 0.7872991 | CTCCTTACCCGGGCGGTACCCGC    |
| mmu-miR-382-3p    | 4.95E-03 | 0.01673073  | 1 | 0.1506408 | 1.7382395 | 0.7143872 | 1.2238049 | 0.5702819 | 3.5159739 | 0.6977001 | AATCATTACGGACAACACTTT      |
| mmu-miR-222-3p    | 4.99E-03 | 0.016771314 | 1 | 0.1176075 | 1.1978463 | 0.2587777 | 2.0301863 | 0.5529001 | 1.8339041 | 0.1542446 | AGCTACATCTGGCTACTGGTCTCT   |
| hsa-miR-7977      | 5.20E-03 | 0.017391405 | 1 | 0.3892841 | 0.7436631 | 0.5078532 | 3.682947  | 0.9320637 | 6.1648424 | 4.1107003 | CCCGGCCAACGCACCA           |

|                  |          |             |   |           |           |           |           |           |           |           |                          |
|------------------|----------|-------------|---|-----------|-----------|-----------|-----------|-----------|-----------|-----------|--------------------------|
| mmu-miR-582-3p   | 5.29E-03 | 0.017519612 | 1 | 0.290331  | 1.0502508 | 0.1731728 | 2.1214745 | 0.0970939 | 1.7353721 | 0.4044018 | AACCTGTTGAACAACCTGAACCC  |
| mmu-miR-342-3p   | 5.30E-03 | 0.017519612 | 1 | 0.1179536 | 0.9414646 | 0.0667833 | 0.8569387 | 0.2121842 | 1.5077798 | 0.1103269 | TCTCACACAGAAATCGCACCCCGT |
| mmu-miR-496a-3p  | 5.40E-03 | 0.017755774 | 1 | 0.4757403 | 2.0560373 | 0.5377885 | 1.0840162 | 0.4024521 | 3.6266225 | 0.7492749 | AGTATTACATGGCCAATCTCC    |
| mmu-miR-409-5p   | 5.61E-03 | 0.018344963 | 1 | 0.3589175 | 2.4981159 | 0.2016965 | 0.7784754 | 0.2953417 | 1.6410004 | 0.3760255 | AGGTTACCCGAGCAACTTTGCAT  |
| mmu-miR-194-5p   | 5.67E-03 | 0.018413039 | 1 | 0.2302868 | 1.386207  | 0.2040148 | 2.9052787 | 0.8708733 | 1.2588619 | 0.3962527 | TGTAACAGCAACTCCATGTGGA   |
| mmu-miR-6538     | 5.70E-03 | 0.018413039 | 1 | 0.2999702 | 1.9440028 | 1.1436939 | 7.041941  | 0.7296326 | 1.6147006 | 1.2666139 | CGCGGGCTCCGGGGC          |
| bta-miR-378      | 5.72E-03 | 0.018413039 | 1 | 0.1181157 | 2.224835  | 0.4944649 | 1.491496  | 0.2974698 | 1.4148635 | 0.2538082 | CCTGGACTTGGAGTCAGAAGGCT  |
| mmu-miR-17-5p    | 5.92E-03 | 0.018934664 | 1 | 0.3303307 | 1.225979  | 0.0878724 | 2.4548547 | 0.4177761 | 2.1884502 | 0.6963248 | CAAAGTGCTTACAGTGCAGGTAG  |
| mmu-miR-542-5p   | 6.09E-03 | 0.019328376 | 1 | 0.2671163 | 0.9438729 | 0.2503843 | 2.0347155 | 0.7322074 | 3.6774023 | 1.8229044 | CTCGGGGATCATCATGTACCGA   |
| mmu-miR-144-3p   | 6.11E-03 | 0.019328376 | 1 | 1.015959  | 15.691404 | 5.7180296 | 14.157613 | 5.8400912 | 9.5186871 | 7.2860747 | TACAGTATAGATGATGTAC      |
| mmu-miR-5126     | 6.17E-03 | 0.019437069 | 1 | 0.537093  | 1.3774477 | 1.2077884 | 5.6867813 | 2.6253156 | 11.344691 | 6.8201904 | GCGCGGGCGGGCCGGGGG       |
| mmu-miR-450a-5p  | 6.53E-03 | 0.020443501 | 1 | 0.1633147 | 1.3582107 | 0.3034625 | 1.7743298 | 0.5885427 | 2.4361341 | 0.2770026 | TTTTGCGATGTGTTCCATAATAT  |
| chi-miR-326-5p   | 6.73E-03 | 0.020875338 | 1 | 0.135016  | 0.8610848 | 0.3711388 | 3.5847342 | 1.1754849 | 2.472339  | 1.33005   | CCTCATCTGTCTGTTGGGCT     |
| mmu-miR-145a-5p  | 6.74E-03 | 0.020875338 | 1 | 0.3201111 | 0.5908406 | 0.1324421 | 0.4066126 | 0.0381804 | 0.4020431 | 0.0867146 | GTCCAGTTTTCCAGGAATCCCTC  |
| mmu-miR-26a-2-3p | 7.08E-03 | 0.021675393 | 1 | 0.281269  | 0.8414142 | 0.1863195 | 0.4389714 | 0.0697446 | 0.6806672 | 0.0903391 | CCTGTTCTTGATTACTTGTTTC   |
| mmu-miR-467c-5p  | 7.13E-03 | 0.021675393 | 1 | 1.7295242 | 14.536997 | 8.7645475 | 54.71416  | 17.898221 | 54.421037 | 16.03314  | TAAGTGCCTGCATGTATATGTG   |
| mmu-miR-378d     | 7.14E-03 | 0.021675393 | 1 | 0.1008627 | 1.5725206 | 0.670377  | 1.0099429 | 0.1594194 | 0.5648632 | 0.0993916 | ACTGGACTTGGAGTCAGAAGGT   |
| mmu-miR-425-5p   | 7.23E-03 | 0.021826036 | 1 | 0.0602518 | 0.8879042 | 0.0848391 | 1.3755272 | 0.3227571 | 1.4868228 | 0.1988631 | AATGACACGATCACTCCCGTTG   |
| oan-miR-1386     | 7.28E-03 | 0.021866895 | 1 | 0.3165177 | 0.6010565 | 0.1744502 | 1.1495189 | 0.1175332 | 1.4544761 | 0.1191957 | TCGGCTCCTGGCTGGCTCGCCA   |
| mmu-miR-126a-3p  | 7.49E-03 | 0.022391448 | 1 | 0.0215421 | 0.9507635 | 0.149753  | 0.7171073 | 0.0887186 | 1.0394132 | 0.0551625 | TCGTACCGTGAGTAATAATGC    |
| mmu-miR-143-3p   | 7.68E-03 | 0.022860619 | 1 | 0.1535765 | 1.365799  | 0.0735043 | 0.9270947 | 0.122811  | 0.7927775 | 0.1444706 | TGAGATGAAGCACTGTAGCT     |
| mmu-miR-23a-5p   | 7.95E-03 | 0.023527499 | 1 | 0.3219745 | 2.5127578 | 0.5520956 | 4.1096851 | 1.8863033 | 3.4214251 | 1.0696368 | GGGGTTCTGGGGATGGGATTT    |
| mmu-miR-652-3p   | 8.19E-03 | 0.024134283 | 1 | 0.2428944 | 0.5902822 | 0.0065492 | 1.1529782 | 0.2409497 | 0.7848517 | 0.0659197 | AATGGCGCCACTAGGGTTGTGA   |
| mmu-miR-410-3p   | 8.43E-03 | 0.024518561 | 1 | 0.5015998 | 1.6942188 | 0.814943  | 0.6646572 | 0.1790523 | 2.7903132 | 0.6988702 | AATATAACACAGATGGCCTGT    |
| sha-miR-24       | 8.44E-03 | 0.024518561 | 1 | 0.4842972 | 0.4684974 | 0.145966  | 0.2489231 | 0.0897534 | 0.2578385 | 0.0529081 | ATCTGGCTCAGTTCAGCAGGAAC  |
| mmu-miR-182-5p   | 8.45E-03 | 0.024518561 | 1 | 0.2686847 | 0.7024421 | 0.2078117 | 0.4429616 | 0.1025267 | 0.3596214 | 0.0924438 | TTTGCAATGGTAGAACTCACACC  |
| mmu-miR-191-3p   | 8.51E-03 | 0.024573195 | 1 | 0.4289188 | 1.4298961 | 0.2257558 | 2.2769702 | 0.5749977 | 2.576579  | 0.4763858 | GCTGCACTTGGATTTTCGTTT    |
| mmu-miR-222-5p   | 8.73E-03 | 0.02508042  | 1 | 0.4709523 | 2.1596529 | 0.3088697 | 2.8272898 | 0.5811644 | 1.4341556 | 0.302107  | GGCTCAGTAGCCAGTGTAGATC   |
| mmu-miR-1948-3p  | 9.03E-03 | 0.02581485  | 1 | 0.3910427 | 0.4915103 | 0.2384145 | 0.6470618 | 0.2539182 | 2.4898556 | 0.8791734 | TTTAGGCAGAGCACTCGTACAG   |
| mmu-miR-8112     | 9.22E-03 | 0.026240084 | 1 | 0.1599005 | 0.5739454 | 0.1055694 | 0.9834943 | 0.1051947 | 0.8473933 | 0.148724  | TCTCGCCACCTCCACCCGAGC    |
| hsa-miR-1261     | 9.63E-03 | 0.027284151 | 1 | 0.3119386 | 2.0406684 | 1.2278387 | 4.9569668 | 0.3904987 | 2.7144925 | 1.080898  | TGGATAAGGCATTGGC         |
| mmu-miR-434-3p   | 9.89E-03 | 0.027871135 | 1 | 0.2642263 | 2.5101291 | 1.2272849 | 0.9134584 | 0.1174769 | 1.4230546 | 0.1173335 | TTTGAACCATCACTCGACTCT    |

notes:

adj P: Benjamini-Hochberg adjusted P value.

**Supplementary Table S5: 18-concurrent wound healing associated microRNA signature <sup>a</sup>**

| miRNA           | tissue | p-value  | adj P <sup>b</sup> | 0 hr |       | 6 hr |       | 24 hr |       | 5 day |       |
|-----------------|--------|----------|--------------------|------|-------|------|-------|-------|-------|-------|-------|
|                 |        |          |                    | fold | stdev | fold | stdev | fold  | stdev | fold  | stdev |
| mmu-miR-148b-3p | skin   | 1.21E-05 | 0.000596           | 1.00 | 0.12  | 1.44 | 0.18  | 3.64  | 0.79  | 2.83  | 0.22  |
|                 | oral   | 3.56E-03 | 0.132005           | 1.00 | 0.1   | 1.3  | 0.4   | 2.42  | 0.97  | 3.25  | 0.63  |
| mmu-miR-31-5p   | skin   | 5.45E-05 | 0.001096           | 1.00 | 0.32  | 0.67 | 0.42  | 0.84  | 0.39  | 11.7  | 1.8   |
|                 | oral   | 6.65E-03 | 0.151662           | 1.00 | 0.07  | 0.8  | 0.22  | 0.95  | 0.08  | 1.49  | 0.12  |
| mmu-miR-23b-3p  | skin   | 4.69E-03 | 0.016241           | 1.00 | 0.18  | 0.71 | 0.09  | 0.64  | 0.11  | 0.5   | 0.07  |
|                 | oral   | 7.19E-03 | 0.151662           | 1.00 | 0.11  | 0.74 | 0.05  | 1.03  | 0.12  | 0.99  | 0.07  |
| mmu-miR-200c-3p | skin   | 1.79E-03 | 0.008742           | 1.00 | 0.21  | 0.58 | 0.19  | 1.29  | 0.2   | 1.64  | 0.17  |
|                 | oral   | 9.24E-03 | 0.163277           | 1.00 | 0.16  | 0.87 | 0.21  | 1.77  | 0.58  | 1.88  | 0.19  |
| mmu-miR-195a-5p | skin   | 5.56E-05 | 0.001096           | 1.00 | 0.15  | 1.09 | 0.14  | 0.61  | 0.04  | 0.43  | 0.05  |
|                 | oral   | 9.79E-03 | 0.163277           | 1.00 | 0.11  | 0.91 | 0.06  | 0.88  | 0.15  | 0.66  | 0.05  |
| mmu-miR-3068-5p | skin   | 4.23E-05 | 0.001042           | 1.00 | 0.17  | 0.63 | 0.05  | 2.02  | 0.53  | 2.54  | 0.38  |
|                 | oral   | 2.27E-04 | 0.075263           | 1.00 | 0.26  | 1.07 | 0.39  | 3.53  | 0.81  | 3.69  | 0.14  |
| mmu-miR-30a-3p  | skin   | 1.03E-04 | 0.001644           | 1.00 | 0.18  | 1.26 | 0.16  | 0.67  | 0.11  | 0.38  | 0.06  |
|                 | oral   | 6.92E-04 | 0.086715           | 1.00 | 0.09  | 1.05 | 0.06  | 0.78  | 0.02  | 0.83  | 0.03  |
| mmu-miR-17-5p   | skin   | 5.92E-03 | 0.018935           | 1.00 | 0.33  | 1.23 | 0.09  | 2.46  | 0.42  | 2.19  | 0.7   |
|                 | oral   | 7.15E-04 | 0.086715           | 1.00 | 0.16  | 0.85 | 0.05  | 1.51  | 0.16  | 0.99  | 0.05  |
| mmu-miR-676-5p  | skin   | 4.75E-03 | 0.016241           | 1.00 | 0.14  | 0.78 | 0.11  | 0.6   | 0.05  | 0.65  | 0.08  |
|                 | oral   | 1.52E-03 | 0.107584           | 1.00 | 0.06  | 1.25 | 0.13  | 1.53  | 0.16  | 1.57  | 0.18  |
| mmu-miR-362-5p  | skin   | 4.65E-08 | 0.000014           | 1.00 | 0.08  | 0.64 | 0.09  | 4.28  | 0.43  | 5.58  | 0.87  |
|                 | oral   | 2.07E-03 | 0.107584           | 1.00 | 0.4   | 0.84 | 0.4   | 3.27  | 1.37  | 4.29  | 0.88  |
| mmu-miR-434-3p  | skin   | 9.89E-03 | 0.027871           | 1.00 | 0.26  | 2.51 | 1.23  | 0.91  | 0.12  | 1.42  | 0.12  |
|                 | oral   | 2.33E-03 | 0.111088           | 1.00 | 0.09  | 1.32 | 0.08  | 0.8   | 0.14  | 0.99  | 0.06  |
| mmu-miR-20a-5p  | skin   | 3.18E-03 | 0.012459           | 1.00 | 0.28  | 1.33 | 0.22  | 2.7   | 0.47  | 2.31  | 0.68  |
|                 | oral   | 2.80E-03 | 0.123245           | 1.00 | 0.14  | 1.11 | 0.06  | 1.72  | 0.35  | 1.45  | 0.02  |
| mmu-miR-425-3p  | skin   | 8.08E-05 | 0.001402           | 1.00 | 0.24  | 0.61 | 0.18  | 2.12  | 0.1   | 2.23  | 0.22  |
|                 | oral   | 3.55E-03 | 0.132006           | 1.00 | 0.15  | 0.8  | 0.34  | 1.59  | 0.01  | 1.91  | 0.13  |
| mmu-miR-340-5p  | skin   | 1.90E-03 | 0.008993           | 1.00 | 0.45  | 2.61 | 1.1   | 6.93  | 2.12  | 3.42  | 1.09  |
|                 | oral   | 3.71E-03 | 0.132006           | 1.00 | 0.09  | 2.05 | 0.49  | 1.28  | 0.24  | 1.1   | 0.16  |
| mmu-miR-664-3p  | skin   | 2.86E-03 | 0.011692           | 1.00 | 0.41  | 1.32 | 0.1   | 0.69  | 0.12  | 0.39  | 0.06  |
|                 | oral   | 4.08E-03 | 0.132006           | 1.00 | 0.08  | 0.93 | 0.03  | 0.77  | 0.15  | 0.64  | 0.05  |
| mmu-miR-7a-5p   | skin   | 5.29E-05 | 0.001096           | 1.00 | 0.3   | 1.87 | 0.13  | 5.41  | 0.81  | 5.67  | 1.74  |
|                 | oral   | 4.95E-03 | 0.134730           | 1.00 | 0.12  | 1.4  | 0.34  | 2.04  | 0.38  | 1.53  | 0.12  |
| mmu-miR-193b-3p | skin   | 2.63E-05 | 0.000844           | 1.00 | 0.08  | 0.74 | 0.05  | 0.53  | 0.11  | 0.24  | 0.05  |
|                 | oral   | 5.61E-03 | 0.142362           | 1.00 | 0.11  | 0.58 | 0.06  | 0.62  | 0.1   | 0.59  | 0.11  |
| mmu-miR-223-3p  | skin   | 7.01E-05 | 0.001296           | 1.00 | 0.19  | 3.47 | 1.05  | 21.9  | 7.09  | 5.34  | 2.8   |
|                 | oral   | 7.42E-03 | 0.151663           | 1.00 | 0.08  | 2.66 | 0.86  | 3.72  | 2.46  | 1.07  | 0.17  |

<sup>a</sup> Cut-off p-value of 0.01 was used. 18 microRNAs that were concurrently differentially expressed in both skin and oral mucosa wound healing were listed.

<sup>b</sup> The Benjamini-Hochberg adjusted P-values were computed for multiple hypothesis testing.



**Supplementary Table S6: Expression changes of the top 10 baseline tissue specific microRNAs in skin and oral mucosa during wound healing**

| miR          | miR-378a-3p |          |          |           |
|--------------|-------------|----------|----------|-----------|
| time course  | 0hr         | 6hr      | 24hr     | 5day      |
| skin (fold)  | 1           | 1.469336 | 0.939103 | 0.8457584 |
| skin (stdev) | 0.012098    | 0.518862 | 0.138471 | 0.087231  |
| p value      |             |          |          | 5.26E-02  |
| oral (fold)  | 0.396452    | 0.290532 | 0.378565 | 0.4084093 |
| oral (stdev) | 0.026353    | 0.013767 | 0.020421 | 0.0358472 |
| p value      |             |          |          | 8.18E-04  |

| miR          | miR-31-5p |          |          |           |
|--------------|-----------|----------|----------|-----------|
| time course  | 0hr       | 6hr      | 24hr     | 5day      |
| skin (fold)  | 1         | 0.669133 | 0.840812 | 11.688945 |
| skin (stdev) | 0.320248  | 0.422529 | 0.38847  | 1.7979082 |
| p value      |           |          |          | 5.45E-05  |
| oral (fold)  | 22.85125  | 18.31651 | 21.60025 | 33.972947 |
| oral (stdev) | 1.692528  | 5.048494 | 1.765137 | 2.6370834 |
| p value      |           |          |          | 6.65E-03  |

| miR          | miR-10a-5p |          |          |           |
|--------------|------------|----------|----------|-----------|
| time course  | 0hr        | 6hr      | 24hr     | 5day      |
| skin (fold)  | 1          | 0.908414 | 0.502462 | 0.2383207 |
| skin (stdev) | 0.131761   | 0.359267 | 0.154867 | 0.0880976 |
| p value      |            |          |          | 2.23E-03  |
| oral (fold)  | 0.00482    | 0.006927 | 0.00965  | 0.0074661 |
| oral (stdev) | 0.002255   | 0.004842 | 0.005031 | 0.0046497 |
| p value      |            |          |          | 5.64E-01  |

| miR          | miR-10b-5p |          |          |           |
|--------------|------------|----------|----------|-----------|
| time course  | 0hr        | 6hr      | 24hr     | 5day      |
| skin (fold)  | 1          | 0.922428 | 0.302635 | 0.2060538 |
| skin (stdev) | 0.15904    | 0.40317  | 0.091135 | 0.0682445 |
| p value      |            |          |          | 1.17E-03  |
| oral (fold)  | 0.163878   | 0.150159 | 0.147039 | 0.1517026 |
| oral (stdev) | 0.0479     | 0.048789 | 0.039186 | 0.027659  |
| p value      |            |          |          | 9.67E-01  |

| miR          | miR-133a-3p |          |         |           |
|--------------|-------------|----------|---------|-----------|
| time course  | 0hr         | 6hr      | 24hr    | 5day      |
| skin (fold)  | 1           | 2.0078   | 0.69721 | 0.1621058 |
| skin (stdev) | 0.565692    | 1.050772 | 0.31428 | 0.0153855 |

|              |          |          |          |           |
|--------------|----------|----------|----------|-----------|
| p value      | 1.11E-03 |          |          |           |
| oral (fold)  | 0.07094  | 0.009774 | 0.014111 | 0.014214  |
| oral (stdev) | 0.030147 | 0.012295 | 0.012636 | 0.0068159 |
| p value      | 6.78E-02 |          |          |           |

| miR          | miR-146b-5p |          |          |           |
|--------------|-------------|----------|----------|-----------|
| time course  | 0hr         | 6hr      | 24hr     | 5day      |
| skin (fold)  | 1           | 1.35334  | 1.779497 | 1.273712  |
| skin (stdev) | 0.098454    | 0.216424 | 0.375257 | 0.2865286 |
| p value      | 2.65E-02    |          |          |           |
| oral (fold)  | 0.161831    | 0.219098 | 0.364548 | 0.2856465 |
| oral (stdev) | 0.04531     | 0.07541  | 0.148361 | 0.1047957 |
| p value      | 1.06E-01    |          |          |           |

| miR          | miR-126a-5p |          |          |           |
|--------------|-------------|----------|----------|-----------|
| time course  | 0hr         | 6hr      | 24hr     | 5day      |
| skin (fold)  | 1           | 1.53879  | 0.936007 | 1.5421504 |
| skin (stdev) | 0.142881    | 0.277857 | 0.32267  | 0.2875119 |
| p value      | 4.75E-02    |          |          |           |
| oral (fold)  | 1.864485    | 2.169465 | 1.86865  | 1.3459816 |
| oral (stdev) | 0.286606    | 0.512187 | 0.720687 | 0.2903343 |
| p value      | 2.11E-01    |          |          |           |

| miR          | miR-34c-5p |          |          |           |
|--------------|------------|----------|----------|-----------|
| time course  | 0hr        | 6hr      | 24hr     | 5day      |
| skin (fold)  | 1          | 1.890395 | 3.441682 | 35.217775 |
| skin (stdev) | 0.354481   | 0.313367 | 0.59346  | 29.988102 |
| p value      | 1.23E-04   |          |          |           |
| oral (fold)  | 83.6016    | 156.4728 | 64.88194 | 46.964317 |
| oral (stdev) | 69.09045   | 154.963  | 77.05825 | 36.915668 |
| p value      | 6.81E-01   |          |          |           |

| miR          | miR-30a-5p |          |          |           |
|--------------|------------|----------|----------|-----------|
| time course  | 0hr        | 6hr      | 24hr     | 5day      |
| skin (fold)  | 1          | 1.251449 | 0.582879 | 0.453159  |
| skin (stdev) | 0.103088   | 0.111781 | 0.022601 | 0.0342868 |
| p value      | 9.89E-07   |          |          |           |
| oral (fold)  | 0.611179   | 0.775242 | 0.580714 | 0.5359318 |
| oral (stdev) | 0.022063   | 0.210435 | 0.080197 | 0.032217  |
| p value      | 9.47E-02   |          |          |           |

| miR | miR-96-5p |  |  |  |
|-----|-----------|--|--|--|
|-----|-----------|--|--|--|

| time course  | 0hr      | 6hr      | 24hr     | 5day      |
|--------------|----------|----------|----------|-----------|
| skin (fold)  | 1        | 1.059792 | 0.343601 | 0.2286068 |
| skin (stdev) | 0.14515  | 0.384041 | 0.045746 | 0.049049  |
| p value      |          |          |          | 1.60E-04  |
| oral (fold)  | 0.577801 | 0.720975 | 0.692673 | 0.3836004 |
| oral (stdev) | 0.076565 | 0.080358 | 0.360337 | 0.0445133 |
| p value      |          |          |          | 1.40E-01  |

**Supplementary Table S7: Statistical analysis on TaqMan assay-based differential expression of miR-21 and miR-101**

**A: Validation of differential expression in tissue samples**

**A.1: miR-21 in tissue samples**

**A.1.a: 2way ANOVA - miR-21 in tissue samples**

| Two-way ANOVA               |       | Ordinary |       | Alpha             |            | 0.05 |  |
|-----------------------------|-------|----------|-------|-------------------|------------|------|--|
| ANOVA table                 | SS    | DF       | MS    | F (Dfn, Dfd)      | P value    |      |  |
| Interaction                 | 51.13 | 3        | 17.04 | F (3, 76) = 5.132 | P = 0.0028 |      |  |
| Row Factor (time)           | 156.7 | 3        | 52.22 | F (3, 76) = 15.72 | P < 0.0001 |      |  |
| Column Factor (tissue type) | 27.26 | 1        | 27.26 | F (1, 76) = 8.209 | P = 0.0054 |      |  |
| Residual                    | 252.4 | 76       | 3.321 |                   |            |      |  |

**A.1.b: Multiple t tests - miR-21 in tissue samples**

|       |       | Mean (skin) |         | Mean (oral) |  | (statistical significance determined by Holm-Sidak method) |              |
|-------|-------|-------------|---------|-------------|--|------------------------------------------------------------|--------------|
|       | Row   |             |         |             |  | P value                                                    | significance |
| 0 hr  | Row 1 | 1           | 1.03525 | 0.880149    |  |                                                            |              |
| 6 hr  | Row 2 | 1.10854     | 1.03525 | 0.784571    |  |                                                            |              |
| 24 hr | Row 3 | 1.79576     | 1.09139 | 0.0493723 * |  |                                                            |              |
| 5 day | Row 4 | 6.47986     | 2.49812 | 0.0415756 * |  |                                                            |              |

**A.1.c: Shapiro-Wilk tests - miR-21 in tissue samples**

|       |       | skin     |        | oral     |        |
|-------|-------|----------|--------|----------|--------|
|       | Row   | P value  | Null   | P value  | Null   |
| 0 hr  | Row 1 | 0.427686 | Accept | 0.436846 | Accept |
| 6 hr  | Row 2 | 0.090062 | Accept | 0.000623 | Reject |
| 24 hr | Row 3 | 0.569615 | Accept | 0.371813 | Accept |
| 5 day | Row 4 | 0.015668 | Reject | 0.145458 | Accept |

**A.2: miR-10b in tissue samples**

**A.2.a: 2way ANOVA - miR-10b in tissue samples**

| Two-way ANOVA               |       | Ordinary |         | Alpha             |            | 0.05 |  |
|-----------------------------|-------|----------|---------|-------------------|------------|------|--|
| ANOVA table                 | SS    | DF       | MS      | F (Dfn, Dfd)      | P value    |      |  |
| Interaction                 | 2.886 | 3        | 0.962   | F (3, 72) = 13.15 | P < 0.0001 |      |  |
| Row Factor (time)           | 2.887 | 3        | 0.9625  | F (3, 72) = 13.16 | P < 0.0001 |      |  |
| Column Factor (tissue type) | 7.154 | 1        | 7.154   | F (1, 72) = 97.81 | P < 0.0001 |      |  |
| Residual                    | 5.266 | 72       | 0.07314 |                   |            |      |  |

**A.2.b: Multiple t tests - miR-10b in tissue samples**

|       |       | Mean (skin) |           | Mean (oral)  |  | (statistical significance determined by Holm-Sidak method) |              |
|-------|-------|-------------|-----------|--------------|--|------------------------------------------------------------|--------------|
|       | Row   |             |           |              |  | P value                                                    | significance |
| 0 hr  | Row 1 | 1           | 0.061636  | 0.00066664 * |  |                                                            |              |
| 6 hr  | Row 2 | 1.07812     | 0.047931  | 2.59E-07 *   |  |                                                            |              |
| 24 hr | Row 3 | 0.296832    | 0.0577083 | 0.00358784 * |  |                                                            |              |
| 5 day | Row 4 | 0.268708    | 0.0485352 | 0.0162982 *  |  |                                                            |              |

**A.2.c: Shapiro-Wilk tests - miR-10b in tissue samples**

|       |       | skin     |        | oral     |        |
|-------|-------|----------|--------|----------|--------|
|       | Row   | P value  | Null   | P value  | Null   |
| 0 hr  | Row 1 | 0.23429  | Accept | 0.000416 | Reject |
| 6 hr  | Row 2 | 0.988214 | Accept | 0.000035 | Reject |
| 24 hr | Row 3 | 0.008166 | Reject | 0.001878 | Reject |
| 5 day | Row 4 | 0.000341 | Reject | 0.004668 | Reject |

**B: Validation of differential expression in LCM samples**

**B.1: miR-21 in LCM samples**

**B.1.a: 2way ANOVA - miR-21 in LCM samples**

| Two-way ANOVA               |       | Ordinary |       | Alpha             |            | 0.05 |  |
|-----------------------------|-------|----------|-------|-------------------|------------|------|--|
| ANOVA table                 | SS    | DF       | MS    | F (Dfn, Dfd)      | P value    |      |  |
| Interaction                 | 23.54 | 3        | 7.846 | F (3, 24) = 7.114 | P = 0.0014 |      |  |
| Row Factor (time)           | 44.02 | 3        | 14.67 | F (3, 24) = 13.30 | P < 0.0001 |      |  |
| Column Factor (tissue type) | 23.56 | 1        | 23.56 | F (1, 24) = 21.36 | P = 0.0001 |      |  |
| Residual                    | 26.47 | 24       | 1.103 |                   |            |      |  |

**B.1.b: Multiple t tests - miR-21 in LCM samples**

|       |       | Mean (skin) |          | Mean (oral)  |  | (statistical significance determined by Holm-Sidak method) |              |
|-------|-------|-------------|----------|--------------|--|------------------------------------------------------------|--------------|
|       | Row   |             |          |              |  | P value                                                    | significance |
| 0 hr  | Row 1 | 1.1444      | 0.235591 | 0.0153373 *  |  |                                                            |              |
| 6 hr  | Row 2 | 0.887953    | 0.131738 | 0.0163974 *  |  |                                                            |              |
| 24 hr | Row 3 | 1.65043     | 1.12877  | 0.530282     |  |                                                            |              |
| 5 day | Row 4 | 5.80185     | 1.12458  | 0.00833249 * |  |                                                            |              |

**B.1.c: Shapiro-Wilk tests - miR-21 in LCM samples**

|       |       | skin     |        | oral     |        |
|-------|-------|----------|--------|----------|--------|
|       | Row   | P value  | Null   | P value  | Null   |
| 0 hr  | Row 1 | 0.947874 | Accept | 0.025577 | Reject |
| 6 hr  | Row 2 | 0.75682  | Accept | 0.083015 | Accept |
| 24 hr | Row 3 | 0.147838 | Accept | 0.018483 | Reject |
| 5 day | Row 4 | 0.897928 | Accept | 0.344031 | Accept |

**B.2: miR-10b in LCM samples**

**B.2.a: 2way ANOVA - miR-10b in LCM samples**

| Two-way ANOVA               |       | Ordinary |         | Alpha             |            | 0.05 |  |
|-----------------------------|-------|----------|---------|-------------------|------------|------|--|
| ANOVA table                 | SS    | DF       | MS      | F (Dfn, Dfd)      | P value    |      |  |
| Interaction                 | 1.859 | 3        | 0.6195  | F (3, 24) = 7.070 | P = 0.0014 |      |  |
| Row Factor (time)           | 1.836 | 3        | 0.612   | F (3, 24) = 6.984 | P = 0.0015 |      |  |
| Column Factor (tissue type) | 4.11  | 1        | 4.11    | F (1, 24) = 46.90 | P < 0.0001 |      |  |
| Residual                    | 2.103 | 24       | 0.08763 |                   |            |      |  |

**B.2.b: Multiple t tests - miR-10b in LCM samples**

|       |       | Mean (skin) |           | Mean (oral)  |  | (statistical significance determined by Holm-Sidak method) |              |
|-------|-------|-------------|-----------|--------------|--|------------------------------------------------------------|--------------|
|       | Row   |             |           |              |  | P value                                                    | significance |
| 0 hr  | Row 1 | 1.17113     | 0.0627785 | 0.00229105 * |  |                                                            |              |
| 6 hr  | Row 2 | 1.3093      | 0.028406  | 0.00742183 * |  |                                                            |              |
| 24 hr | Row 3 | 0.310278    | 0.04828   | 0.0565111    |  |                                                            |              |
| 5 day | Row 4 | 0.25989     | 0.044054  | 0.0814784    |  |                                                            |              |

**B.2.c: Shapiro-Wilk tests - miR-10b in LCM samples**

|       |       | skin     |        | oral     |        |
|-------|-------|----------|--------|----------|--------|
|       | Row   | P value  | Null   | P value  | Null   |
| 0 hr  | Row 1 | 0.223427 | Accept | 0.469074 | Accept |
| 6 hr  | Row 2 | 0.680263 | Accept | 0.412278 | Accept |
| 24 hr | Row 3 | 0.275825 | Accept | 0.22837  | Accept |
| 5 day | Row 4 | 0.048727 | Reject | 0.002357 | Reject |

**Supplementary Table S8: Statistical analysis on closure of the wounds treated with miR-21 and miR-10b reagents**

**A: wounds treated with control and miR-21 mimic**

**A.1: 2way ANOVA - wounds treated with control and miR-21 mimic**

| Two-way ANOVA             | Ordinary |     |       | Alpha              |            |
|---------------------------|----------|-----|-------|--------------------|------------|
|                           |          |     |       | 0.05               |            |
| ANOVA table               | SS       | DF  | MS    | F (DFn, DFd)       | P value    |
| Interaction               | 335.2    | 9   | 37.24 | F (9, 100) = 1.581 | P = 0.1312 |
| Row Factor (time)         | 54038    | 9   | 6004  | F (9, 100) = 254.8 | P < 0.0001 |
| Column Factor (treatment) | 1216     | 1   | 1216  | F (1, 100) = 51.59 | P < 0.0001 |
| Residual                  | 2356     | 100 | 23.56 |                    |            |

**A.2: Multiple t tests - wounds treated with control and miR-21 mimic**

(statistical significance determined by Holm-Sidak method)

|        | Mean (ctrl) | Mean (miR-21) | P value      | significance | Difference | SE of differ t ratio | df         |
|--------|-------------|---------------|--------------|--------------|------------|----------------------|------------|
| day 1  | 28.5867     | 32.735        | 0.311891     |              | -4.14833   | 3.89494              | 1.06506 10 |
| day 2  | 47.0717     | 51.395        | 0.210477     |              | -4.32333   | 3.23082              | 1.33815 10 |
| day 3  | 54.3733     | 59.775        | 0.261995     |              | -5.40167   | 4.54393              | 1.18876 10 |
| day 4  | 61.3967     | 72.4817       | 0.00110855 * |              | -11.085    | 2.4525               | 4.51988 10 |
| day 5  | 68.465      | 79.685        | 0.00036866 * |              | -11.22     | 2.13354              | 5.25886 10 |
| day 6  | 75.3533     | 84.1083       | 0.0126509 *  |              | -8.755     | 2.88828              | 3.03122 10 |
| day 7  | 82.2717     | 90.9317       | 0.00292527 * |              | -8.66      | 2.21627              | 3.90747 10 |
| day 8  | 88.1333     | 94.6467       | 0.0391902 *  |              | -6.51333   | 2.74674              | 2.3713 10  |
| day 9  | 95.9417     | 98.8817       | 0.00687099 * |              | -2.94      | 0.866929             | 3.39128 10 |
| day 10 | 98.97       | 99.5783       | 0.163996     |              | -0.608334  | 0.405013             | 1.50201 10 |

**A.3: Shapiro-Wilk tests - wounds treated with control and miR-21 mimic**

|        | ctrl            | miR-21          |
|--------|-----------------|-----------------|
|        | P value         | Null            |
| day 1  | 0.880938 Accept | 0.015552 Reject |
| day 2  | 0.048305 Reject | 0.354856 Accept |
| day 3  | 0.965486 Accept | 0.774883 Accept |
| day 4  | 0.676812 Accept | 0.591661 Accept |
| day 5  | 0.691616 Accept | 0.832817 Accept |
| day 6  | 0.340818 Accept | 0.486321 Accept |
| day 7  | 0.065263 Accept | 0.810627 Accept |
| day 8  | 0.482778 Accept | 0.409187 Accept |
| day 9  | 0.127901 Accept | 0.279401 Accept |
| day 10 | 0.129791 Accept | 0.180812 Accept |

**B: wounds treated with control and miR-10b LNA**

**B.1: 2way ANOVA - wounds treated with control and miR-10b LNA**

| Two-way ANOVA             | Ordinary |    |       | Alpha              |            |
|---------------------------|----------|----|-------|--------------------|------------|
|                           |          |    |       | 0.05               |            |
| ANOVA table               | SS       | DF | MS    | F (DFn, DFd)       | P value    |
| Interaction               | 529.1    | 9  | 58.79 | F (9, 87) = 0.7714 | P = 0.6430 |
| Row Factor (time)         | 84927    | 9  | 9436  | F (9, 87) = 123.8  | P < 0.0001 |
| Column Factor (treatment) | 1251     | 1  | 1251  | F (1, 87) = 16.42  | P = 0.0001 |
| Residual                  | 6630     | 87 | 76.21 |                    |            |

**B.2: Multiple t tests - wounds treated with control and miR-10b LNA**

(statistical significance determined by Holm-Sidak method)

|        | Mean (ctrl) | Mean (miR-10b) | P value      | significance | Difference | SE of differ t ratio | df         |
|--------|-------------|----------------|--------------|--------------|------------|----------------------|------------|
| day 1  | 11.2085     | 23.95          | 0.151825     |              | -12.7414   | 8.13706              | 1.56585 9  |
| day 2  | 24.4597     | 33.2662        | 0.245699     |              | -8.80655   | 7.09181              | 1.24179 9  |
| day 3  | 36.2235     | 48.8293        | 0.100135     |              | -12.6058   | 6.87992              | 1.83227 9  |
| day 4  | 47.6599     | 52.779         | 0.434157     |              | -5.11904   | 6.25346              | 0.818593 9 |
| day 5  | 54.4978     | 60.861         | 0.283508     |              | -6.36319   | 5.57918              | 1.14052 9  |
| day 6  | 63.9945     | 70.4322        | 0.279583     |              | -6.43774   | 5.41722              | 1.18838 6  |
| day 7  | 74.8959     | 87.2205        | 0.00296294 * |              | -12.3246   | 3.0565               | 4.03225 9  |
| day 8  | 93.4787     | 97.2499        | 0.296344     |              | -3.77115   | 3.4017               | 1.10861 9  |
| day 9  | 97.7562     | 98.1437        | 0.77031      |              | -0.387475  | 1.28763              | 0.300922 9 |
| day 10 | 99.302      | 100            | 0.00186593   |              | -0.69804   | 0.160682             | 4.34422 9  |

**B.3: Shapiro-Wilk tests - wounds treated with control and miR-10b LNA**

|        | ctrl            | miR-10b         |
|--------|-----------------|-----------------|
|        | P value         | Null            |
| day 1  | 0.079956 Accept | 0.829051 Accept |
| day 2  | 0.230435 Accept | 0.450255 Accept |
| day 3  | 0.096018 Accept | 0.758435 Accept |
| day 4  | 0.081085 Accept | 0.355892 Accept |
| day 5  | 0.240936 Accept | 0.131831 Accept |
| day 6  | 0.495443 Accept | 0.904362 Accept |
| day 7  | 0.659012 Accept | 0.248763 Accept |
| day 8  | 0.016694 Reject | 0.050619 Accept |
| day 9  | 0.907885 Accept | 0.017018 Reject |
| day 10 | 0.565286 Accept | NaN Reject      |
